# Supplementary material
Source: PubMed Central journal article supplement (PMC8092871)
Supplement: AAC.00143-21-s0001.pdf [file AAC.00143-21-s0001.pdf]

**A****Phage 9181**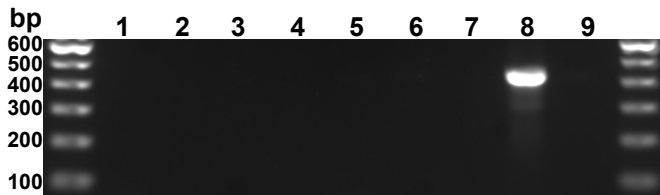**B****Phage 9183**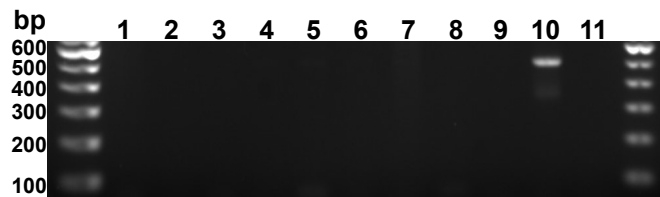**C****Phage 9184**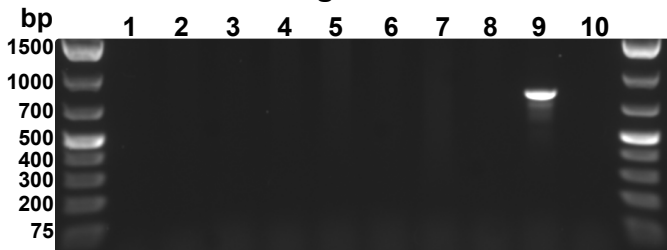**Figure S1**

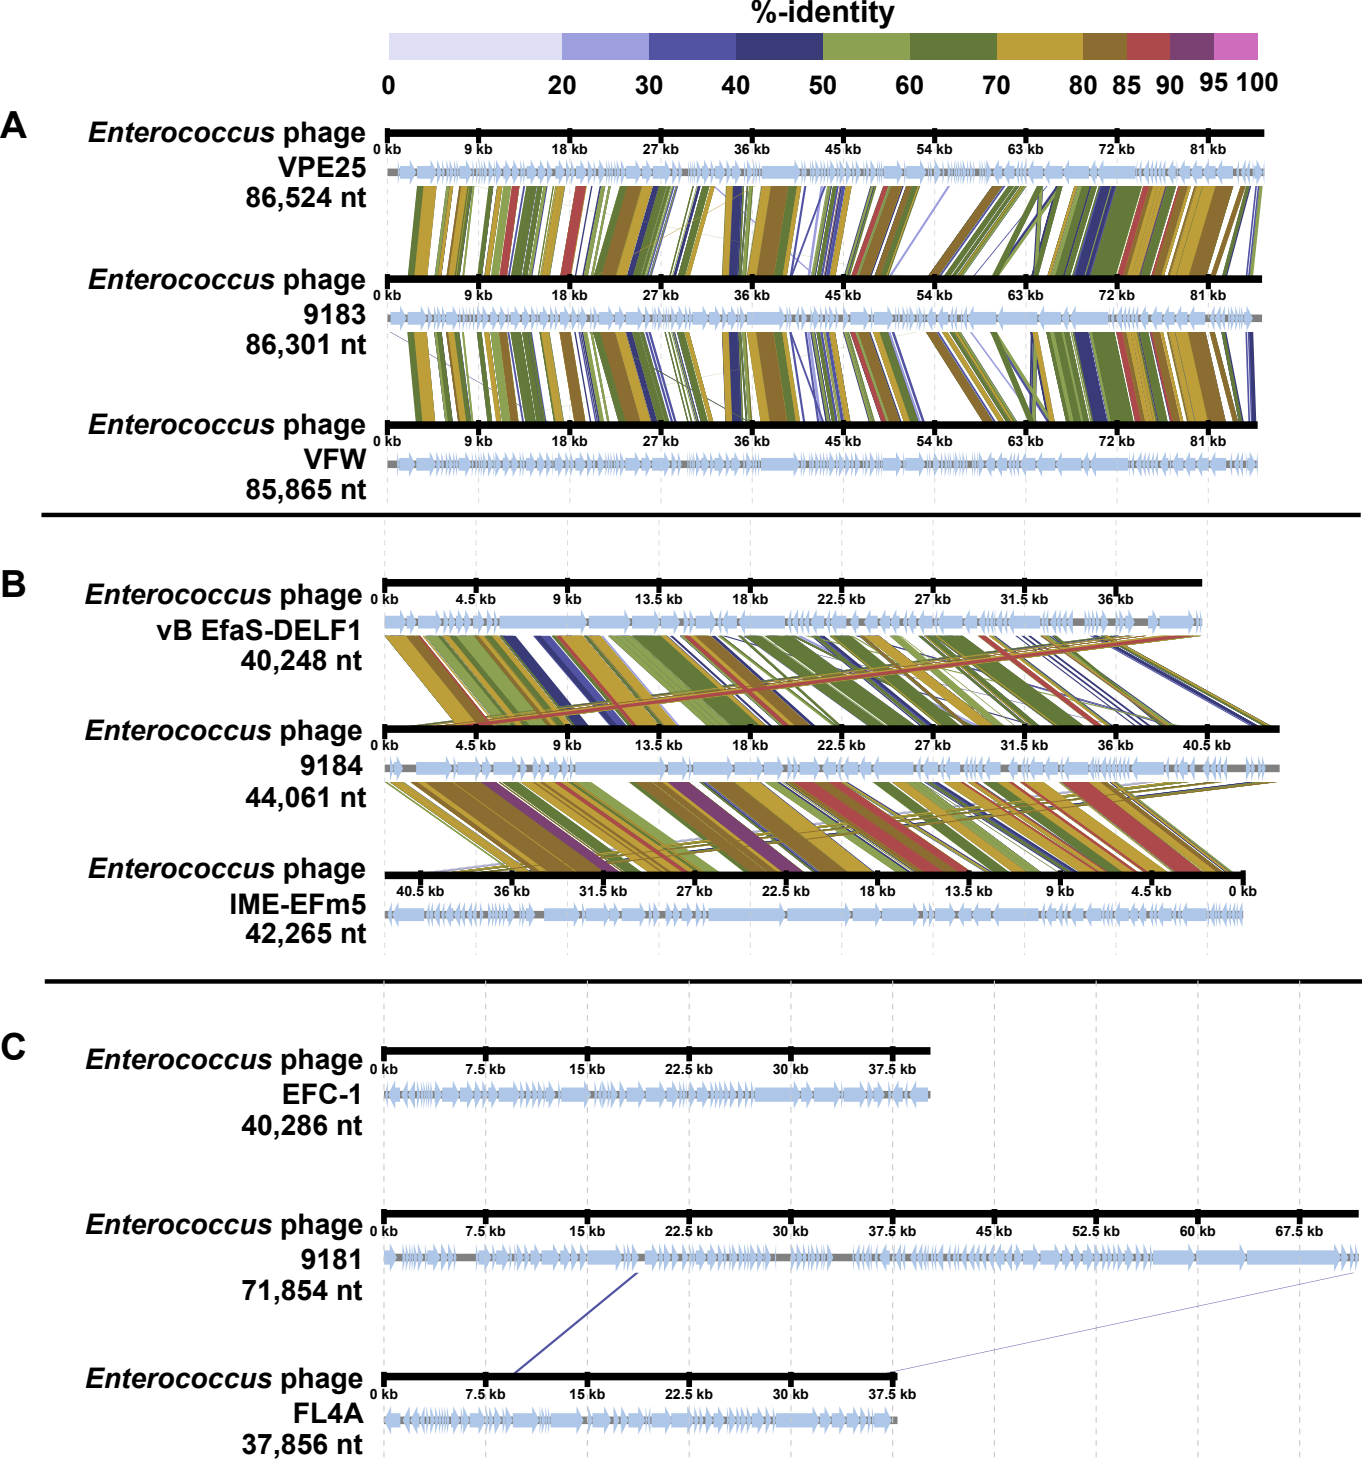

**Figure S2**

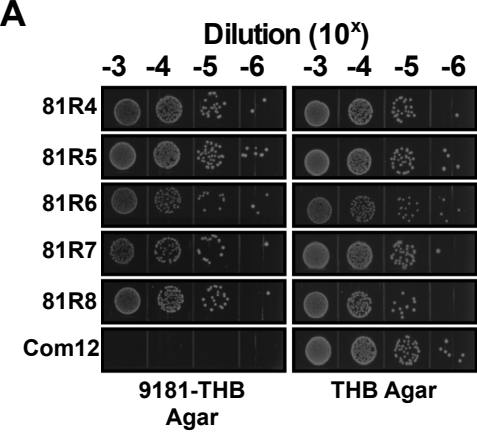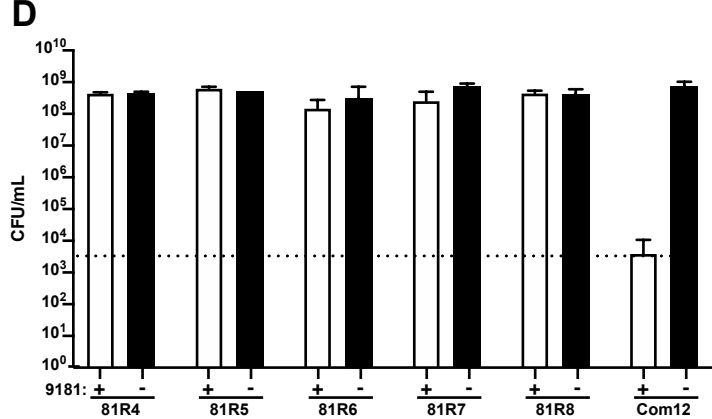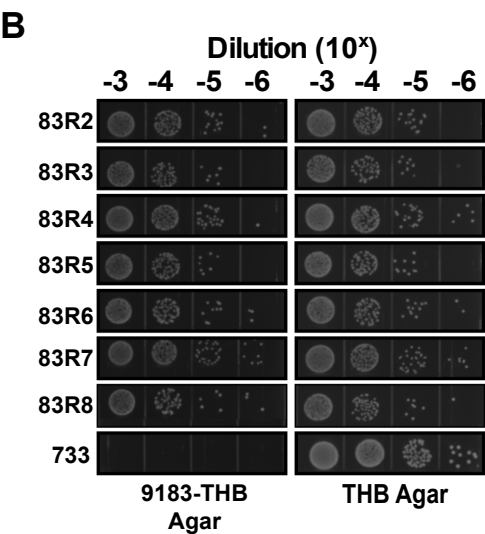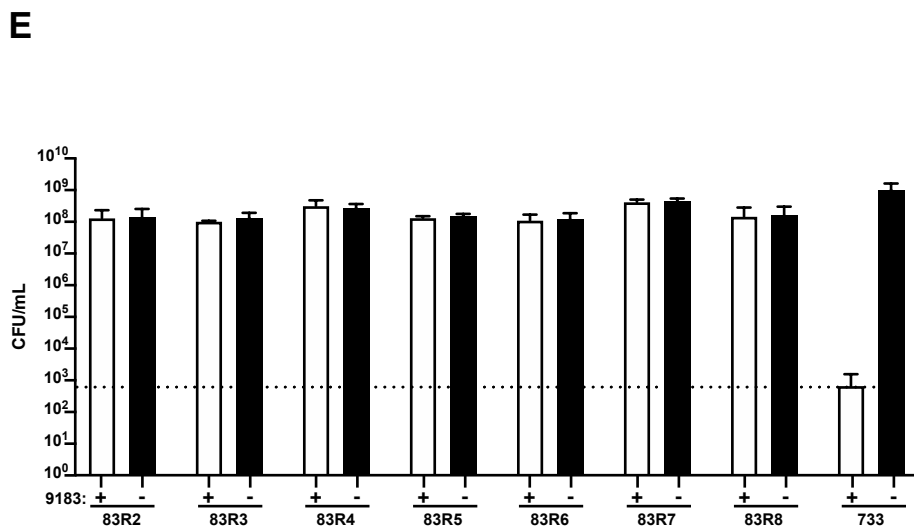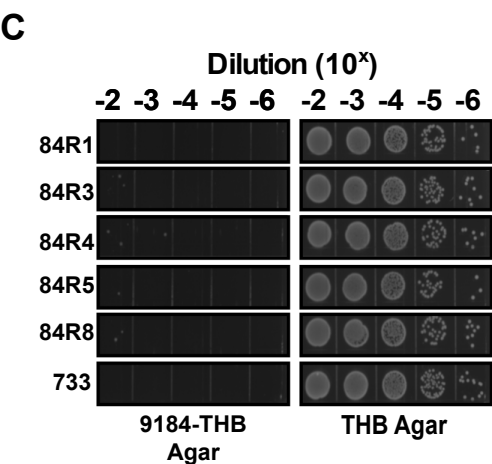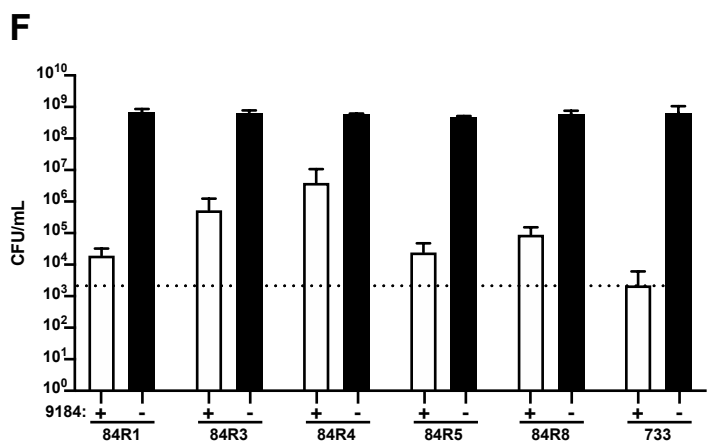

**Figure S3**

|       |     | Identities                                                    | Positives    | Gaps       |  |  |
|-------|-----|---------------------------------------------------------------|--------------|------------|--|--|
|       |     | 513/538(95%)                                                  | 515/538(95%) | 20/538(3%) |  |  |
| Com12 | 1   | VKKSLSISAVMVCSMTLTAVASPIAAAADDFDSQIQQQDQKIADLNKQQADAQSQIDALES | 60           |            |  |  |
| Com15 | 1   | +KKSLSISAVMVCSMTLTAVASPIAAAADDFDSQIQQQDQKIADLNKQQADAQSQIDALES | 60           |            |  |  |
| Com12 | 61  | QVSEINTQAQDLLAKQDTLRQESAQLVKDIADLQERIEKREDDTIQKQAREAQVNTSSNY  | 120          |            |  |  |
| Com15 | 61  | QVSEINTQAQDLLAKQDTLRQESAQLVKDIADLQERIEKREDDTIQKQAREAQVNTSSNY  | 120          |            |  |  |
| Com12 | 121 | IDAVLNADSLADAIGRVQAMTMMVKANNLMEQQKQDKKAVEDKKAENDAKLKELAENQA   | 180          |            |  |  |
| Com15 | 121 | IDAVLNADSLADAIGRVQAMTMMVKANNLMEQQKQDKKAVEDKKAENDAKLKELAENQA   | 180          |            |  |  |
| Com12 | 181 | ALESQKGDLLSKQADLNVLKTSLAEEQATAEDKKADLNKQKAEAEAEQARIREQQRLEAQ  | 240          |            |  |  |
| Com15 | 181 | ALESQKGDLLSKQADLNVLKTSLAEEQATAEDKKADLNKQKAEAEAEQARIREQQRLEAQ  | 240          |            |  |  |
| Com12 | 241 | ARQQAQEKAEKEAREQAEAEQAATQASSAQAQSSASESSAAQSSTTESSAAQSSTTE     | 300          |            |  |  |
| Com15 | 241 | ARQQAQEKAEKEAREQAEAEQAATQASSAQAQSSASESSAAQSSTTESSAAQSSTTE     | 300          |            |  |  |
| Com12 | 301 | ESTTAPESSTTEESTTAPESSTTEESTTVPESSTTEESTTVPESSTTEESTTVPESSTTE  | 360          |            |  |  |
| Com15 | 301 | ESTTAPESSTTEESTTAPESSTTEESTTVPESSTTEESTTVPESSTTEESTTVPESSTTE  | 360          |            |  |  |
| Com12 | 361 | ESTTVPETSTEESTTPAPTTPSTQSDVDPGNSTGNSATNNT-----TNTTPTPTPSG     | 412          |            |  |  |
| Com15 | 357 | -----STEESTTTPAPTTPSTQSDVDPGNSTGNSATNNTTNTTTPXXXTNTTPTPTPSG   | 408          |            |  |  |
| Com12 | 413 | SVNGAAIVAEAYKYGTPYVCGCKDPSPGFDCSGFTRYVQVTGRDIGGWTVPQESAGTK    | 472          |            |  |  |
| Com15 | 409 | SVNGAAIVAEAYKYGTPYVCGCKDPSPGFDCSGFTRYVQVTGRDIGGWTVPQESAGTK    | 468          |            |  |  |
| Com12 | 473 | ISVSQAKAGDLLFWGSPGCTYHVAIALGGGQYIHAPQPGESVKVGSVQVWFAPDFAVSM   | 530          |            |  |  |
| Com15 | 469 | ISVSQAKAGDLLFWGSPGCTYHVAIALGGGQYIHAPQPGESVKVGSVQVWFAPDFAVSM   | 526          |            |  |  |

81R3 and 81R4 (W433G and W433C, respectively)  
81R5 (G460D)  
81R6 (note: L insertion between Y451 and L452)  
81R8 (G435V)  
Active Site Residues (C443, H494, H506)  
Peptidoglycan Clamp Residues (W433 and W462)

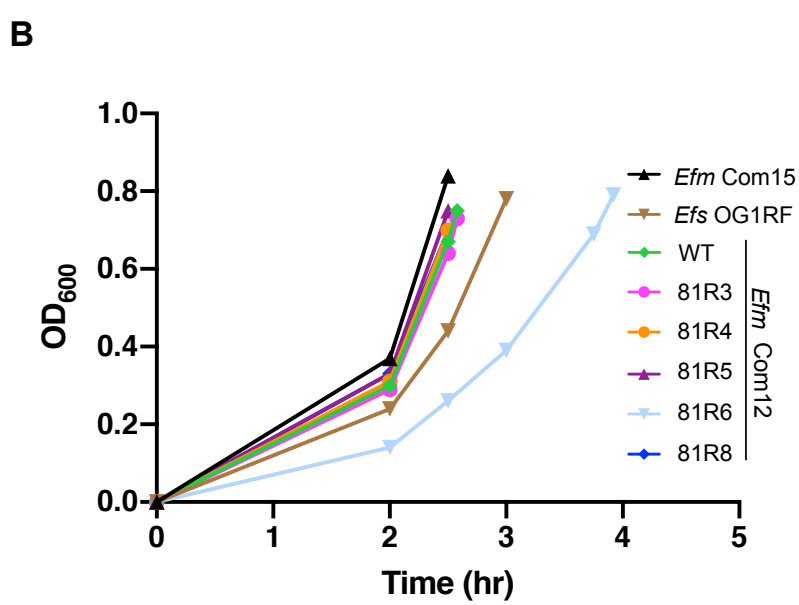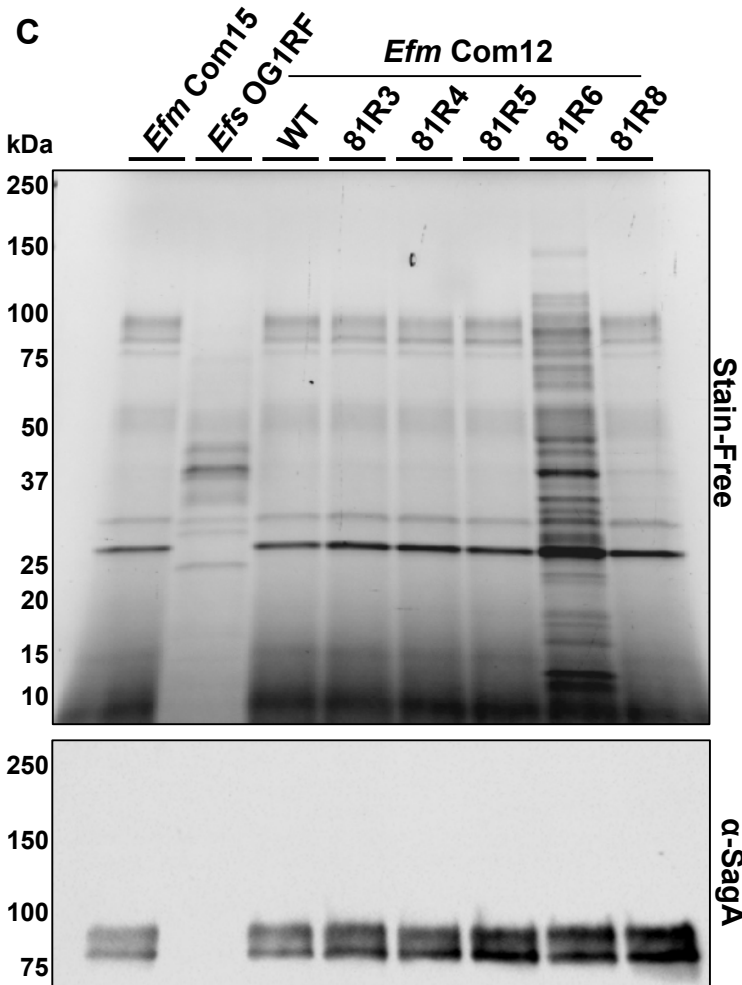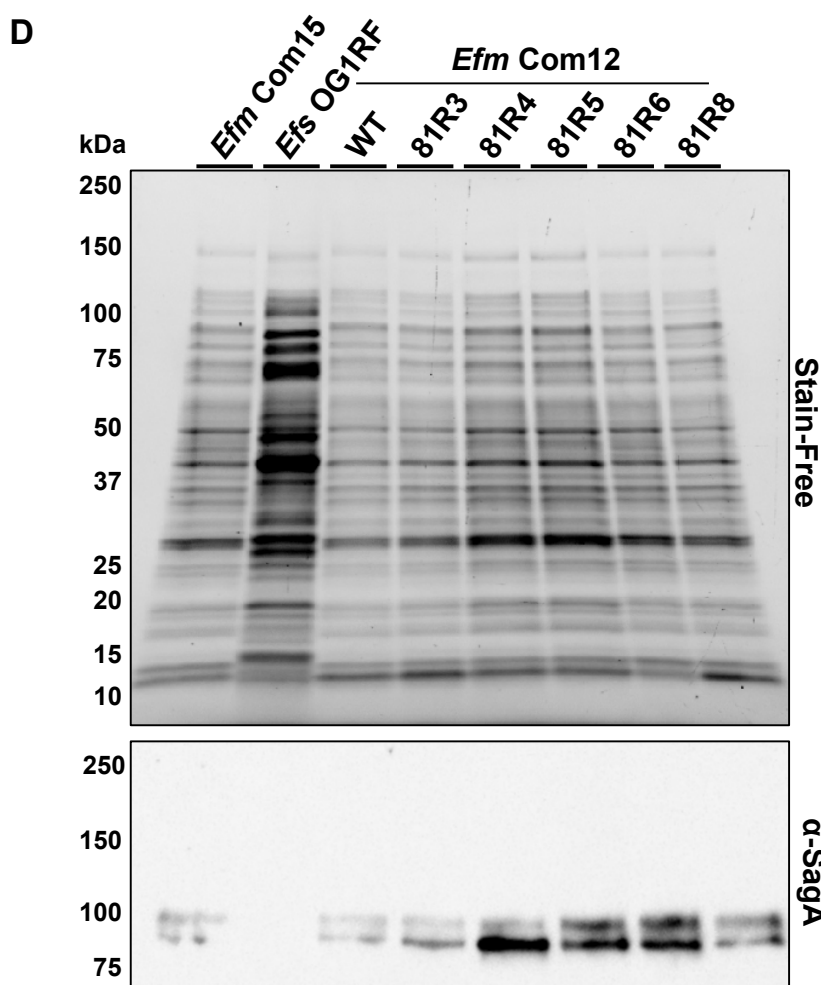

Figure S4

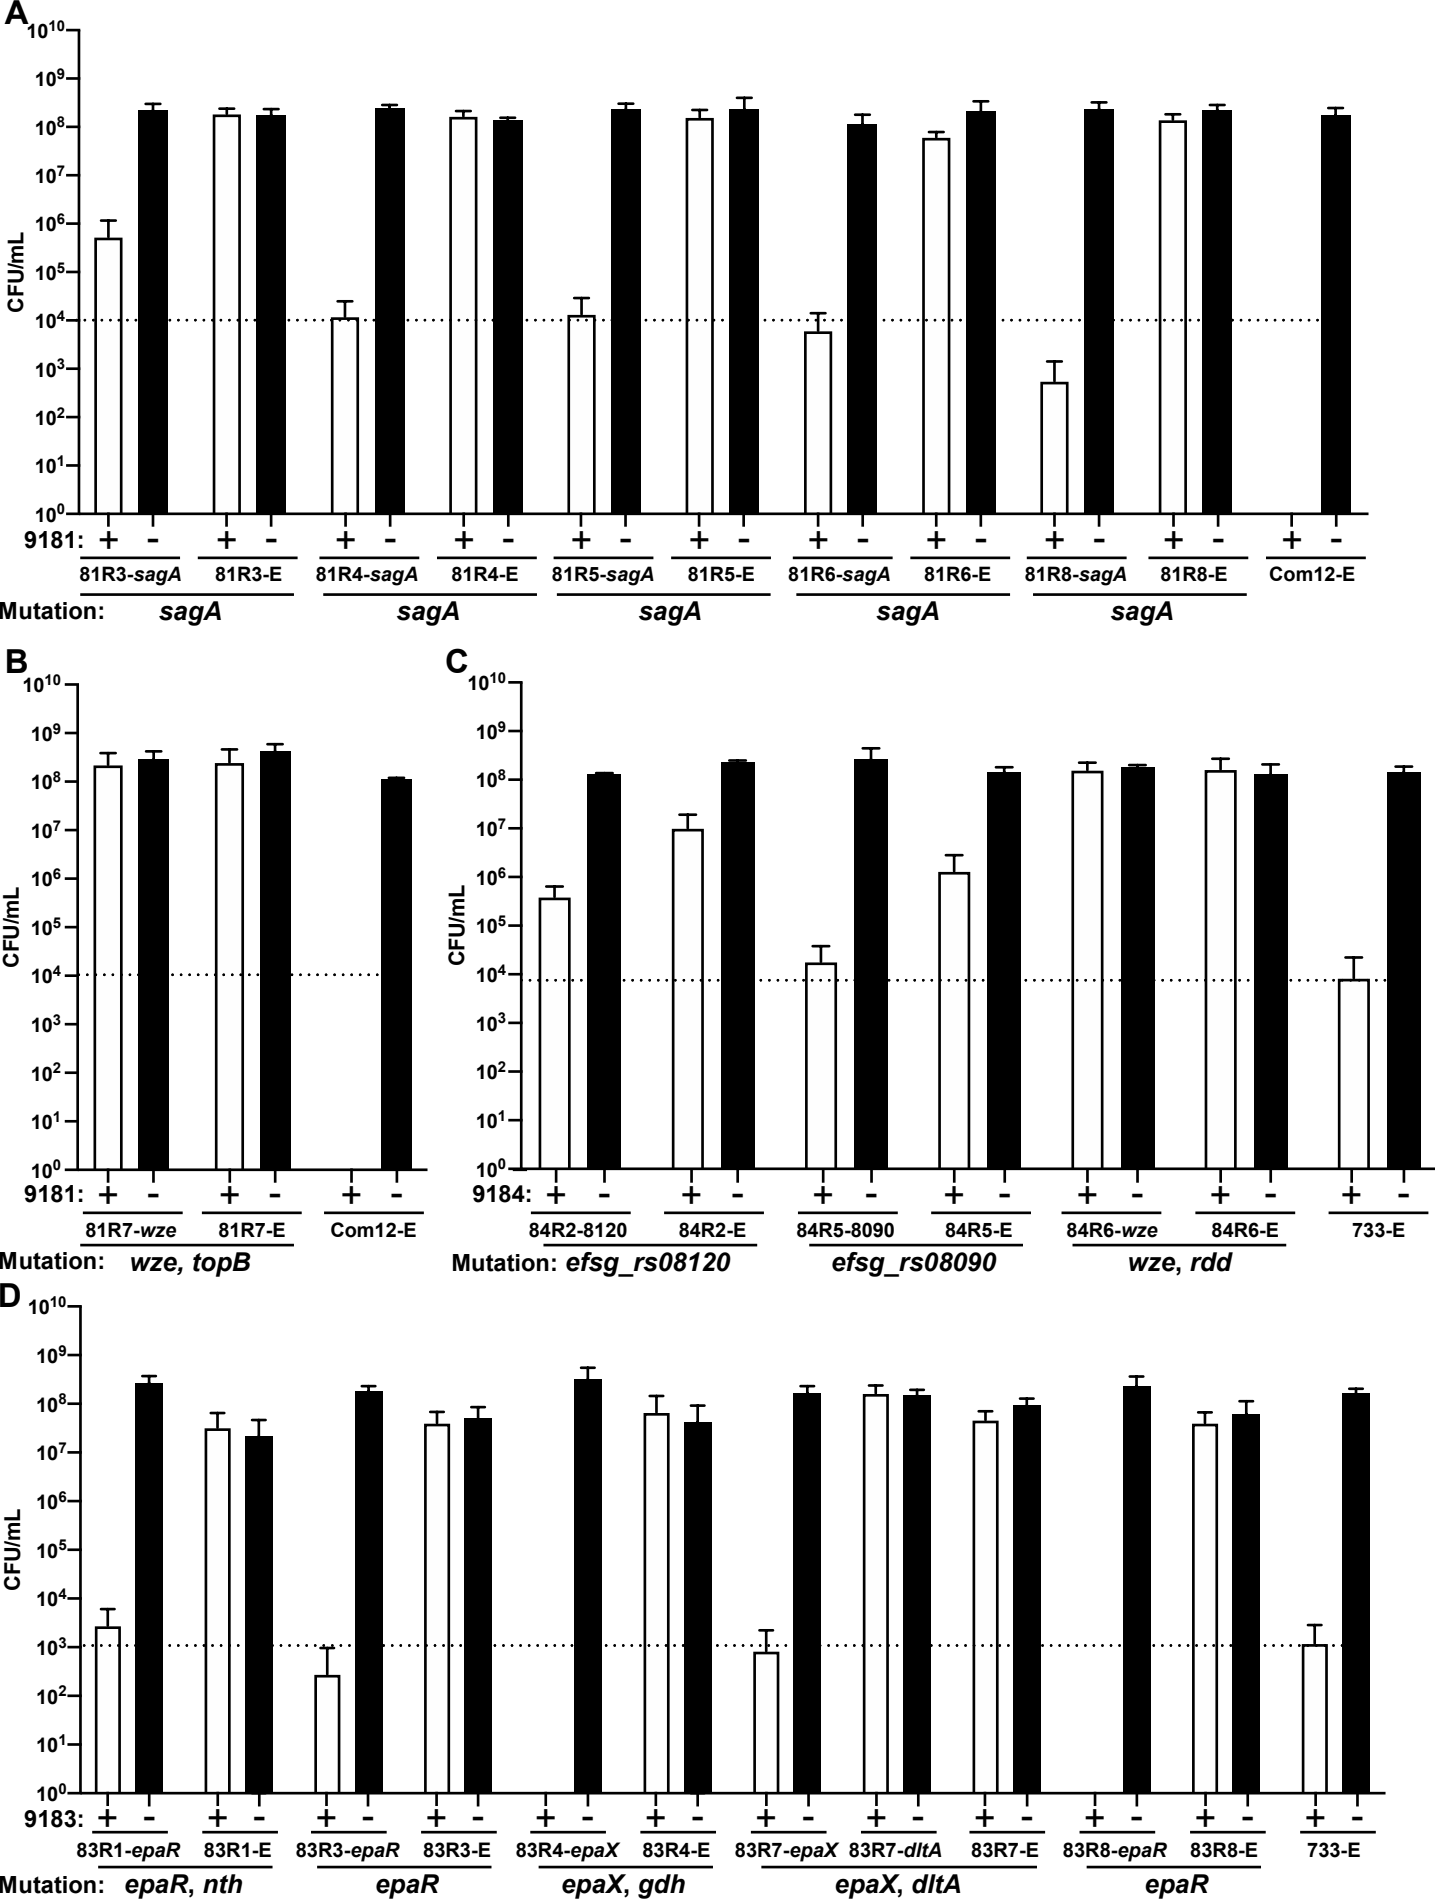

Figure S5

**A**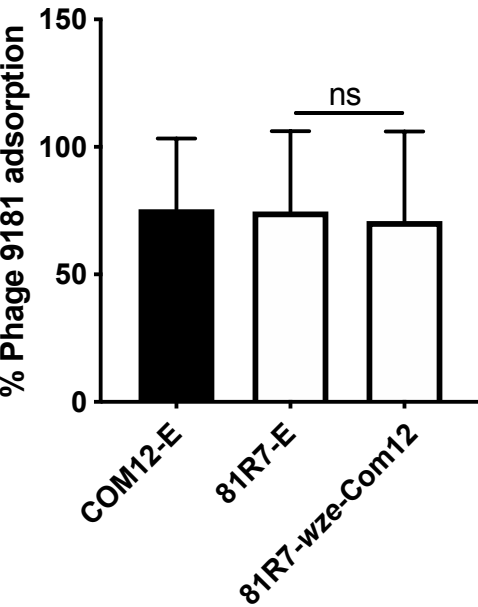**B**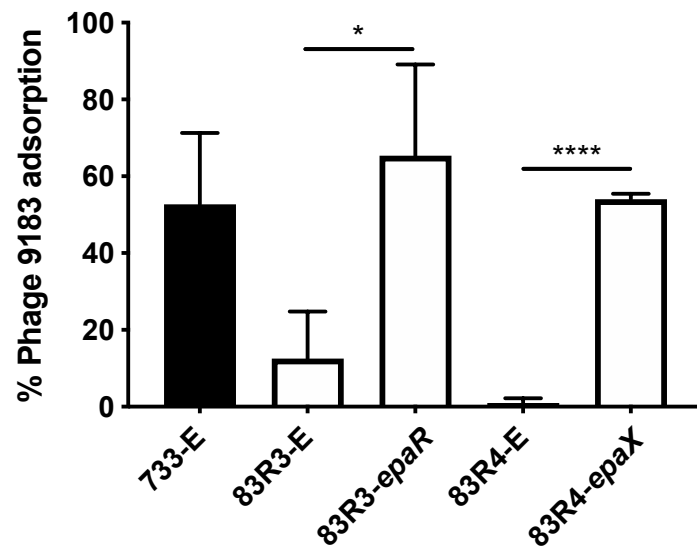**C**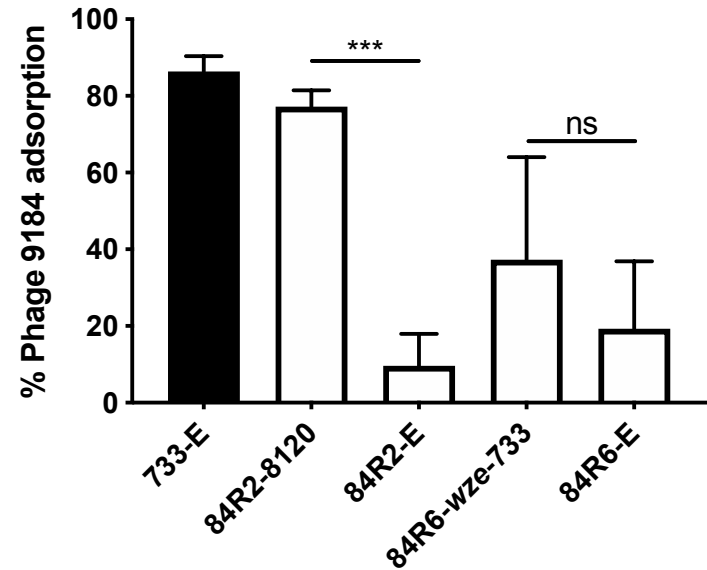**Figure S6**

## Supplemental Figure Legends

**Figure S1. PCR screen for phage lysogeny in phage resistant mutants.** A molecular weight marker with corresponding band sizes in base pairs (i.e. bp) is shown at the far left and right of each gel image. (A) PCR screen for phage 9181 lysin gene in *E. faecium* or phage 9181 genomic DNA. Lane numbers correspond to the following genomic DNA samples: 1) 81R3, 2) 81R4, 3) 81R5, 4) 81R6, 5) 81R7, 6) 81R8, 7) *E. faecium* Com12, 8) Phage 9181, 9) negative control. (B) PCR screen for phage 9183 integrase gene in *E. faecium* or phage 9183 genomic DNA. Lane numbers correspond to the following genomic DNA samples: 1) 83R1, 2) 83R2, 3) 83R3, 4) 83R4, 5) 83R5, 6) 83R6, 7) 83R7, 8) 83R8, 9) *E. faecium* 1,141,733, 10) Phage 9183, 11) negative control. (C) PCR screen for phage 9184 lysin gene in *E. faecium* or phage 9184 genomic DNA. Lane numbers correspond to the following genomic DNA samples: 1) 84R1, 2) 84R2, 3) 84R3, 4) 84R4, 5) 84R5, 6) 84R6, 7) 84R8, 8) *E. faecium* 1,141,733, 9) phage 9184, 10) negative control.

**Figure S2. *Enterococcus faecium* phage orthoclusters.** Phage protein coding sequence alignments were performed with nearest neighbors. Colored lines connecting genomes indicate percent protein identity along the length of each genome. (A) Phage 9183 demonstrates protein homology and similar genome organization to its nearest neighbor intra-orthocluster phages (phages VFW and VPE25). (B) Phage 9184 demonstrates proteome homology and similar genome organization to its nearest neighbor intra-orthocluster phages (phages vB EfaS-DELFI and IME-EFm5). (C) Phage 9181 shows little to no protein homology to its nearest neighbor extra-orthocluster phages (phages EFC-1 and FLA4).

**Figure S3. Phage resistant mutants of *E. faecium* following exposure to phages 9181, 9183 and 9184.** Phage 9181 (A), 9183 (B), and 9184 (C) susceptibility assays and associated bacterial enumeration of wild type and phage resistant mutants in the presence (white bars) or absence (black bars) of phage (A-F) from three independent experiments. Phage 9181 (A, D) and phage 9183 (B, E) resistant strains exhibit  $\geq 5$ -logs of survival versus *E. faecium* Com12 and 1,141,733 (i.e. 733), respectively. Phage 9184 (C, F) resistant strains exhibit a weak resistance phenotypes. The dotted line indicates the spontaneous mutation threshold

conferring phage resistance observed in the respective wild type host strain of each phage. The threshold was placed to aid in discriminating weak phage resistance phenotypes versus the parental strain.

**Figure S4. SagA is conserved in *E. faecium* Com12 and Com15 and SagA is expressed in *sagA***

**mutants.** (A) Displayed is the BLASTP alignment of SagA between Com12 and Com15, showing 95% similarity and strict conservation of peptidoglycan clamp (orange lettering) and active site residues (red lettering). Colored highlights indicate the location of amino acid changes detected in phage 9181 resistant mutants (81R3 and 81R4 – green highlight, 81R5 – yellow highlight, 81R6 – blue highlight, 81R8 – magenta highlight). Specific amino acid changes are noted below the alignment in parentheses next to their respective phage resistant mutant. (B) Growth of *E. faecalis* OG1RF, *E. faecium* Com15, Com12 (WT) and *sagA* mutants (81R3-6; 81R8) are similar in BHI, except for 81R6. (C,D) Displayed is the whole protein fraction (upper panel; Stain-Free) and Western Blot of SagA (lower panel;  $\alpha$ -SagA) taken from the exponential phase ( $OD_{600} \sim 0.8$ ) supernatants (C) or cell pellets (D) of *E. faecalis* OG1RF, *E. faecium* Com15, Com12 (WT), and *sagA* mutants (81R3-6; 81R8). Protein band sizes are demonstrated to the left of each panel in kilodaltons (kDa).

**Figure S5. Complementation restores phage susceptibility in phage resistant mutants.**

Bacterial enumeration from Phage 9181 (A and B), 9184 (C), and 9183 (D) phage susceptibility assays of wild type and phage resistant mutants complemented with their respective wild type allele or empty vector. Assays were performed in the presence (white bars) or absence (black bars) of phages from two independent experiments. The bars and error bars indicate the average and standard deviation from two independent experiments. The dotted line indicates the spontaneous mutation threshold conferring phage resistance observed in the respective wild type host strain of each phage.

**Figure S6. Complementation restores phage adsorption in phage resistant mutants.** Percentage phage adsorption of phage resistant mutants, complemented phage resistant mutants, or their parental strains to Phage 9181 (A), 9183 (B), and 9184 (C). Parental and phage resistant mutants were complemented with the empty vector (E; pLZ12a) and compared to their complemented phage resistant mutant strain. Data represent



the mean percent adsorption and standard deviation from three independent experiments. \*,  $P < 0.05$ ; \*\*\*,  $P < 0.001$ ; \*\*\*\*,  $P < 0.0001$ ; ns, non-significant by unpaired Student's  $t$  test.

**Table S1A. *Enterococcus faecium* phage 9181 genome organization and features**

| Phage 9181 genome annotation |            |           |        |        |                                                                      |                    |        |              |             |           |                                    |  |
|------------------------------|------------|-----------|--------|--------|----------------------------------------------------------------------|--------------------|--------|--------------|-------------|-----------|------------------------------------|--|
| Feature ID                   | Gene Start | Gene Stop | Length | Strand | blastp Best-Hit cut-off (0.001) Number                               | Best-Hit Accession | % Gaps | % Identities | % Positives | E-value   | Predicted Function                 |  |
| ORF1                         | 15         | 959       | 945    | +      | N-acetylmuramoyl-L-alanine amidase<br><i>Enterococcus hirae</i>      | OJG47739           | 6      | 53           | 66          | 7.88E-98  | N-acetylmuramoyl-L-alanine amidase |  |
| ORF2                         | 1362       | 1601      | 240    | +      |                                                                      |                    |        |              |             |           | hypothetical protein               |  |
| ORF3                         | 1605       | 1853      | 249    | +      |                                                                      |                    |        |              |             |           | hypothetical protein               |  |
| ORF4                         | 1866       | 2048      | 183    | +      |                                                                      |                    |        |              |             |           | hypothetical protein               |  |
| ORF5                         | 2045       | 2185      | 141    | +      |                                                                      |                    |        |              |             |           | hypothetical protein               |  |
| ORF6                         | 2199       | 2483      | 285    | +      |                                                                      |                    |        |              |             |           | hypothetical protein               |  |
| ORF7                         | 2496       | 2906      | 411    | +      | hypothetical protein<br>EFP29_60 <i>Enterococcus</i><br>phage EF-P29 | APU00246           | 0      | 45           | 68          | 2.70E-31  | hypothetical protein               |  |
| ORF8                         | 3020       | 3178      | 159    | +      | hypothetical protein<br><i>Enterococcus casseliflavus</i>            | WP_010749468       | 0      | 43           | 61          | 5.02E-04  | hypothetical protein               |  |
| ORF9                         | 3193       | 4158      | 966    | +      | hypothetical protein<br>X878_0035 <i>Enterococcus</i><br>phage VD13  | YP_009036396       | 10     | 47           | 64          | 6.70E-70  | hypothetical protein               |  |
| ORF10                        | 4191       | 4730      | 540    | +      |                                                                      |                    |        |              |             |           | hypothetical protein               |  |
| ORF11                        | 4727       | 5146      | 420    | +      |                                                                      |                    |        |              |             |           | hypothetical protein               |  |
| ORF12                        | 5148       | 5348      | 201    | +      | <i>Enterococcus</i> phage<br>IMEEF1                                  | YP_009603964       | 3      | 58           | 70          | 8.41E-15  | hypothetical protein               |  |
| ORF13                        | 6777       | 6971      | 195    | +      |                                                                      |                    |        |              |             |           | hypothetical protein               |  |
| ORF14                        | 6976       | 7929      | 954    | +      | hypothetical protein<br><i>Enterococcus</i> phage<br>vB_EfaS_Ef2.2   | QBZ69248           | 1      | 50           | 70          | 7.56E-109 | DNA primase                        |  |
| ORF15                        | 7990       | 8268      | 279    | +      |                                                                      |                    |        |              |             |           | hypothetical protein               |  |
| ORF16                        | 8268       | 9251      | 984    | +      | hypothetical protein<br><i>Enterococcus</i><br>wangshanyuanii        | WP_088271390       | 10     | 36           | 53          | 1.69E-51  | Rnl2 family RNA ligase             |  |
| ORF17                        | 9253       | 9459      | 207    | +      | hypothetical protein<br><i>Enterococcus faecium</i>                  | WP_002324739       | 0      | 65           | 76          | 6.90E-08  | hypothetical protein               |  |
| ORF18                        | 9469       | 9618      | 150    | +      |                                                                      |                    |        |              |             |           | hypothetical protein               |  |
| ORF19                        | 9608       | 9787      | 180    | +      |                                                                      |                    |        |              |             |           | hypothetical protein               |  |
| ORF20                        | 9787       | 10323     | 537    | +      | hypothetical protein<br><i>Pseudomonas</i>                           | WP_092194385       | 9      | 39           | 54          | 4.74E-20  | HNH endonuclease                   |  |

|       |       |       |      |   |                                                                                |                    |   |    |    |           |                                                                |
|-------|-------|-------|------|---|--------------------------------------------------------------------------------|--------------------|---|----|----|-----------|----------------------------------------------------------------|
| ORF21 | 10382 | 10759 | 378  | + | hypothetical protein<br>Enterococcus gallinarum                                | WP_142976764<br>.1 | 0 | 79 | 79 | 1.00E-20  | ribonucleoside-<br>diphosphate reductase                       |
| ORF22 | 10795 | 11613 | 819  | + | DNA replication protein<br>Enterococcus phage<br>vB_EfaS_EF1c55                | QEM41680           | 2 | 57 | 75 | 3.19E-95  | DNA replication initiator<br>protein                           |
| ORF23 | 11610 | 12983 | 1374 | + | replicative DNA helicase<br>Streptococcus phage<br>SPQS1                       | YP_008320518       | 1 | 59 | 78 | 0.00E+00  | DNA helicase                                                   |
| ORF24 | 12994 | 13791 | 798  | + |                                                                                |                    |   |    |    |           | hypothetical protein                                           |
| ORF25 | 13788 | 14348 | 561  | + |                                                                                |                    |   |    |    |           | hypothetical protein                                           |
| ORF26 | 14430 | 14984 | 555  | + | LPS glycosyltransferase<br>Enterococcus phage Entf1                            | QDB70555           | 2 | 33 | 49 | 1.26E-05  | LPS glycosyltransferase                                        |
| ORF27 | 14984 | 17605 | 2622 | + | DNA polymerase I<br>Enterococcus phage<br>vB_EfaS_Ef2.2                        | QBZ69269           | 4 | 51 | 66 | 0.00E+00  | DNA polymerase I                                               |
| ORF28 | 17671 | 17919 | 249  | + | hypothetical protein                                                           |                    |   |    |    |           | hypothetical protein                                           |
| ORF29 | 17919 | 18248 | 330  | + |                                                                                |                    |   |    |    |           | hypothetical protein                                           |
| ORF30 | 18271 | 18801 | 531  | + | hypothetical protein<br>Enterococcus faecalis                                  | WP_016624495       | 4 | 26 | 55 | 7.23E-12  | hypothetical protein                                           |
| ORF31 | 18896 | 19243 | 348  | + | hypothetical protein<br>Enterococcus phage<br>vB_EfaS_Ef2.2                    | QBZ69253           | 0 | 51 | 67 | 2.64E-27  | HNH endonuclease                                               |
| ORF32 | 19227 | 20279 | 1053 | + | hypothetical protein<br>Enterococcus phage<br>vB_EfaS_EF1c55                   | QEM41676           | 1 | 54 | 71 | 4.96E-126 | exonuclease                                                    |
| ORF33 | 20279 | 20608 | 330  | + |                                                                                |                    |   |    |    |           | hypothetical protein                                           |
| ORF34 | 20602 | 21168 | 567  | + | crossover junction<br>endodeoxyribonuclease<br>RuvC Enterococcus phage<br>SAP6 | YP_009604008       | 1 | 44 | 65 | 3.79E-44  | crossover junction<br>endodeoxyribonuclease<br>RuvC            |
| ORF35 | 21152 | 21742 | 591  | + | hypothetical protein<br>Enterococcus phage<br>vB_EfaS_Ef2.2                    | QBZ69257           | 5 | 43 | 64 | 8.23E-39  | adenylate kinase                                               |
| ORF36 | 21717 | 22448 | 732  | + | hypothetical protein<br>A958_gp43 Enterococcus<br>phage BC611                  | YP_006488770       | 3 | 31 | 50 | 4.25E-16  | RNA polymerase sigma<br>factor                                 |
| ORF37 | 22519 | 22734 | 216  | + |                                                                                |                    |   |    |    |           | hypothetical protein                                           |
| ORF38 | 22734 | 22961 | 228  | + |                                                                                |                    |   |    |    |           | hypothetical protein                                           |
| ORF39 | 22980 | 23780 | 801  | + | hypothetical protein<br>EFP01_126 Enterococcus<br>phage EFP01                  | APZ82053           | 0 | 75 | 89 | 1.17E-147 | deoxyadenosine kinase<br>deoxyguanosine kinase                 |
| ORF40 | 23837 | 24568 | 732  | + | PnuC-like NrdR-regulated<br>deoxyribonucleotide                                | QDB71576           | 0 | 73 | 87 | 3.66E-126 | PnuC-like NrdR-regulated<br>deoxyribonucleotide<br>transporter |

| transporter Enterococcus phage vB_OCPT_Ben |       |       |     |   |                                                           |              |    |    |    |          |                                            |
|--------------------------------------------|-------|-------|-----|---|-----------------------------------------------------------|--------------|----|----|----|----------|--------------------------------------------|
| ORF41                                      | 24670 | 25059 | 390 | + |                                                           |              |    |    |    |          | hypothetical protein                       |
| ORF42                                      | 25056 | 25277 | 222 | + |                                                           |              |    |    |    |          | Double-strand recombination repair protein |
| ORF43                                      | 25270 | 25446 | 177 | + |                                                           |              |    |    |    |          | hypothetical protein                       |
| ORF44                                      | 25458 | 25661 | 204 | + |                                                           |              |    |    |    |          | hypothetical protein                       |
| ORF45                                      | 25661 | 26080 | 420 | + |                                                           |              |    |    |    |          | hypothetical protein                       |
| ORF46                                      | 26064 | 26549 | 486 | + |                                                           |              |    |    |    |          | hypothetical protein                       |
| ORF47                                      | 26543 | 26797 | 255 | + |                                                           |              |    |    |    |          | hypothetical protein                       |
| ORF48                                      | 26797 | 27000 | 204 | + |                                                           |              |    |    |    |          | hypothetical protein                       |
| ORF49                                      | 26997 | 27512 | 516 | + |                                                           |              |    |    |    |          | hypothetical protein                       |
| ORF50                                      | 27509 | 27958 | 450 | + |                                                           |              |    |    |    |          | hypothetical protein                       |
| ORF51                                      | 27948 | 28082 | 135 | + |                                                           |              |    |    |    |          | hypothetical protein                       |
| ORF52                                      | 28219 | 28551 | 333 | + | putative HNH endonuclease Lactococcus phage 340           | YP_008318136 | 8  | 39 | 51 | 1.08E-12 | HNH endonuclease                           |
| ORF53                                      | 28806 | 28910 | 105 | - |                                                           |              |    |    |    |          | hypothetical protein                       |
| ORF54                                      | 29273 | 29425 | 153 | - |                                                           |              |    |    |    |          | hypothetical protein                       |
| ORF55                                      | 29777 | 29890 | 114 | + |                                                           |              |    |    |    |          | hypothetical protein                       |
| ORF56                                      | 29993 | 30400 | 408 | + | hypothetical protein Pef771_147 Enterococcus phage Pef771 | QEP29564     | 10 | 41 | 57 | 4.63E-23 | terminal repeat-encoded protein P          |
| ORF57                                      | 30416 | 30883 | 468 | + |                                                           |              |    |    |    |          | hypothetical protein                       |
| ORF58                                      | 30887 | 31168 | 282 | + | hypothetical protein EFP01_182 Enterococcus phage EFP01   | APZ82109     | 0  | 46 | 73 | 2.96E-22 | hypothetical protein                       |
| ORF59                                      | 31161 | 31466 | 306 | + |                                                           |              |    |    |    |          | hypothetical protein                       |
| ORF60                                      | 31488 | 31826 | 339 | + | hypothetical protein Enterococcus phage vB_EfaS_PHB08     | QBX32893     | 5  | 54 | 65 | 1.40E-21 | hypothetical protein                       |
| ORF61                                      | 31868 | 32149 | 282 | + | hypothetical protein EFP29_02 Enterococcus phage EF-P29   | APU00188     | 0  | 81 | 89 | 2.59E-46 | hypothetical protein                       |
| ORF62                                      | 32237 | 32392 | 156 | + |                                                           |              |    |    |    |          | hypothetical protein                       |
| ORF63                                      | 32394 | 32561 | 168 | + |                                                           |              |    |    |    |          | hypothetical protein                       |

|       |       |       |     |   |                                                                               |              |    |    |    |          |                                       |
|-------|-------|-------|-----|---|-------------------------------------------------------------------------------|--------------|----|----|----|----------|---------------------------------------|
| ORF64 | 32673 | 33122 | 450 | + |                                                                               |              |    |    |    |          | hypothetical protein                  |
| ORF65 | 33332 | 33427 | 96  | - |                                                                               |              |    |    |    |          | hypothetical protein                  |
| ORF66 | 33635 | 33739 | 105 | + |                                                                               |              |    |    |    |          | hypothetical protein                  |
| ORF67 | 33761 | 33880 | 120 | - |                                                                               |              |    |    |    |          | hypothetical protein                  |
| ORF68 | 33961 | 34110 | 150 | - |                                                                               |              |    |    |    |          | hypothetical protein                  |
| ORF69 | 34175 | 34354 | 180 | + |                                                                               |              |    |    |    |          | hypothetical protein                  |
| ORF70 | 34395 | 34508 | 114 | - |                                                                               |              |    |    |    |          | hypothetical protein                  |
| ORF71 | 34521 | 34652 | 132 | - |                                                                               |              |    |    |    |          | hypothetical protein                  |
| ORF72 | 34698 | 35060 | 363 | - | DUF1642 domain-<br>containing protein<br>Enterococcus gilvus                  | WP_010781701 | 8  | 34 | 59 | 9.30E-10 | DUF1642 domain-<br>containing protein |
| ORF73 | 35153 | 35398 | 246 | - |                                                                               |              |    |    |    |          | hypothetical protein                  |
| ORF74 | 35395 | 35790 | 396 | - |                                                                               |              |    |    |    |          | hypothetical protein                  |
| ORF75 | 35803 | 35952 | 150 | - |                                                                               |              |    |    |    |          | hypothetical protein                  |
| ORF76 | 36157 | 36384 | 228 | - |                                                                               |              |    |    |    |          | hypothetical protein                  |
| ORF77 | 36507 | 37277 | 771 | - |                                                                               |              |    |    |    |          | hypothetical protein                  |
| ORF78 | 37264 | 37518 | 255 | - |                                                                               |              |    |    |    |          | hypothetical protein                  |
| ORF79 | 37478 | 37690 | 213 | - |                                                                               |              |    |    |    |          | hypothetical protein                  |
| ORF80 | 37671 | 38156 | 486 | - |                                                                               |              |    |    |    |          | hypothetical protein                  |
| ORF81 | 38149 | 38421 | 273 | - |                                                                               |              |    |    |    |          | hypothetical protein                  |
| ORF82 | 38396 | 38488 | 93  | - |                                                                               |              |    |    |    |          | hypothetical protein                  |
| ORF83 | 38778 | 39251 | 474 | - |                                                                               |              |    |    |    |          | hypothetical protein                  |
| ORF84 | 39253 | 39684 | 432 | - | DUF1642 domain-<br>containing protein<br>Enterococcus faecium                 | WP_142972308 | 11 | 37 | 53 | 4.03E-11 | DUF1642 domain-<br>containing protein |
| ORF85 | 39684 | 39974 | 291 | - |                                                                               |              |    |    |    |          | hypothetical protein                  |
| ORF86 | 39986 | 40141 | 156 | - | hypothetical protein<br>A5816_000554<br>Enterococcus sp.<br>3G1_DIV0629       | OTO28288     | 0  | 50 | 75 | 2.88E-04 | hypothetical protein                  |
| ORF87 | 40141 | 40302 | 162 | - | hypothetical protein<br>HMPREF9524_01966<br>Enterococcus faecium<br>TX0133a01 | EFR67890     | 0  | 43 | 61 | 3.88E-04 | hypothetical protein                  |

|        |       |       |      |   |                                                                               |              |   |    |     |          |                                                        |
|--------|-------|-------|------|---|-------------------------------------------------------------------------------|--------------|---|----|-----|----------|--------------------------------------------------------|
| ORF88  | 40299 | 40487 | 189  | - | Uncharacterised protein<br>Enterococcus hirae                                 | VTQ86473     | 0 | 54 | 76  | 9.00E-06 | hypothetical protein                                   |
| ORF89  | 40499 | 40705 | 207  | - | hypothetical protein<br>Enterococcus durans                                   | WP_144775119 | 0 | 99 | 99  | 1.44E-41 | hypothetical protein                                   |
| ORF90  | 40702 | 41226 | 525  | - | DUF1642 domain-<br>containing protein<br>Enterococcus faecium                 | WP_104889537 | 9 | 52 | 65  | 1.26E-52 | DUF1642 domain-<br>containing protein                  |
| ORF91  | 41219 | 41428 | 210  | - | hypothetical protein<br>Enterococcus faecium                                  | WP_010722442 | 0 | 99 | 100 | 1.17E-40 | hypothetical protein                                   |
| ORF92  | 41484 | 41765 | 282  | - |                                                                               |              |   |    |     |          | hypothetical protein                                   |
| ORF93  | 41762 | 41932 | 171  | - |                                                                               |              |   |    |     |          | hypothetical protein                                   |
| ORF94  | 41922 | 42161 | 240  | - |                                                                               |              |   |    |     |          | hypothetical protein                                   |
| ORF95  | 42182 | 42397 | 216  | - |                                                                               |              |   |    |     |          | HNH endonuclease                                       |
| ORF96  | 42487 | 42951 | 465  | - |                                                                               |              |   |    |     |          | hypothetical protein                                   |
| ORF97  | 43031 | 43522 | 492  | - |                                                                               |              |   |    |     |          | hypothetical protein                                   |
| ORF98  | 43519 | 43902 | 384  | - |                                                                               |              |   |    |     |          | hypothetical protein                                   |
| ORF99  | 44003 | 44392 | 390  | - |                                                                               |              |   |    |     |          | hypothetical protein                                   |
| ORF100 | 44523 | 44957 | 435  | - |                                                                               |              |   |    |     |          | hypothetical protein                                   |
| ORF101 | 44960 | 45754 | 795  | - | dUTP diphosphatase<br>Rummeliibacillus sp.<br>TYF005                          | WP_124217124 | 3 | 45 | 63  | 5.46E-32 | deoxyuridine 5-<br>triphosphate<br>nucleotidohydrolase |
| ORF102 | 45769 | 46302 | 534  | - | hypothetical protein<br>T548_0137 Lactococcus<br>phage phiL47                 | YP_009007015 | 7 | 28 | 47  | 3.93E-05 | hypothetical protein                                   |
| ORF103 | 46458 | 47102 | 645  | + | terminase small subunit<br>Enterococcus phage EF-<br>P29                      | APU00269     | 3 | 54 | 73  | 9.24E-62 | terminase small subunit                                |
| ORF104 | 47099 | 48376 | 1278 | + | terminase large subunit<br>Enterococcus phage<br>vB_EfaS_Ef7.1                | QBZ69408     | 0 | 65 | 80  | 0.00E+00 | terminase large subunit                                |
| ORF105 | 48389 | 49963 | 1575 | + | phage portal protein<br>Streptococcus phage<br>SPQS1                          | YP_008320482 | 3 | 61 | 76  | 0.00E+00 | portal protein                                         |
| ORF106 | 49976 | 50722 | 747  | + | hypothetical protein<br>Enterococcus phage<br>vB_EfaS_Ef2.2                   | QBZ69220     | 4 | 33 | 51  | 1.74E-28 | capsid head<br>morphogenesis protein                   |
| ORF107 | 50824 | 51468 | 645  | + | DUF4355 domain-<br>containing protein partial<br><i>Oceanospirillum linum</i> | WP_139363748 | 0 | 71 | 87  | 3.01E-64 | DUF4355 domain-<br>containing protein                  |
| ORF108 | 51506 | 52354 | 849  | + | putative major head protein<br>Enterococcus phage VD13                        | YP_009036381 | 1 | 50 | 72  | 2.61E-92 | major capsid head protein                              |

|        |       |       |      |   |                                                                      |              |    |    |    |           |                                       |
|--------|-------|-------|------|---|----------------------------------------------------------------------|--------------|----|----|----|-----------|---------------------------------------|
| ORF109 | 52357 | 52875 | 519  | + | major tail protein<br>Staphylococcus phage<br>vB_SauS_IMEP5          | ANM47024     | 2  | 55 | 71 | 2.58E-38  | major tail protein                    |
| ORF110 | 52946 | 53329 | 384  | + | head-tail connector family<br>protein Enterococcus phage<br>EF-P10   | AQT27721     | 2  | 52 | 75 | 6.58E-39  | head-tail connector family<br>protein |
| ORF111 | 53341 | 53706 | 366  | + | hypothetical protein<br>Enterococcus phage<br>vB_EfaS_IME198         | YP_009218888 | 4  | 50 | 63 | 4.81E-29  | hypothetical protein                  |
| ORF112 | 53694 | 54071 | 378  | + | hypothetical protein<br>A958_gp18 Enterococcus<br>phage BC611        | YP_006488745 | 2  | 35 | 54 | 7.15E-16  | hypothetical protein                  |
| ORF113 | 54082 | 54567 | 486  | + | hypothetical protein<br>Enterococcus phage<br>vB_EfaS_Ef2.2          | QBZ69227     | 0  | 64 | 77 | 1.43E-58  | tail protein                          |
| ORF114 | 54590 | 55291 | 702  | + | hypothetical protein<br>Enterococcus phage<br>vB_EfaS_Ef2.2          | QBZ69228     | 0  | 64 | 79 | 4.12E-103 | Major tail-protein                    |
| ORF115 | 55417 | 55860 | 444  | + | Ig domain-containing<br>protein Staphylococcus<br>equorum            | WP_069832504 | 7  | 51 | 68 | 1.39E-33  | major tail protein                    |
| ORF116 | 55981 | 56415 | 435  | + | hypothetical protein<br>Enterococcus phage<br>vB_EfaS_IME198         | YP_009218892 | 1  | 58 | 76 | 5.45E-51  | hypothetical protein                  |
| ORF117 | 56471 | 56671 | 201  | + |                                                                      |              |    |    |    |           | hypothetical protein                  |
| ORF118 | 56688 | 59813 | 3126 | + | minor capsid protein<br>Enterococcus phage<br>IMEEF1                 | YP_009603974 | 13 | 42 | 58 | 0.00E+00  | tail tape measure protein             |
| ORF119 | 59828 | 63598 | 3771 | + | tail fiber protein<br>Enterococcus phage Entf1                       | QDB70491     | 6  | 36 | 57 | 7.92E-89  | tail fiber protein                    |
| ORF120 | 63610 | 70560 | 6951 | + | BppU family phage<br>baseplate upper protein<br>Enterococcus faecium | WP_016628906 | 1  | 87 | 92 | 0.00E+00  | tail fiber protein                    |
| ORF121 | 70560 | 71102 | 543  | + |                                                                      |              |    |    |    |           | hypothetical protein                  |
| ORF122 | 71222 | 71554 | 333  | + | holin Enterococcus phage<br>vB_EfaS-DELf1                            | BBQ04297     | 0  | 54 | 78 | 5.88E-26  | holin                                 |
| ORF123 | 71568 | 71843 | 276  | + | phage holin Enterococcus<br>faecium                                  | WP_086319065 | 0  | 67 | 85 | 2.79E-39  | holin                                 |

**Table S1B. *Enterococcus faecium* phage 9183 genome organization and features**

**Phage 9183 genome annotation**

| Feature ID | Gene Start | Gene Stop | Length | Strand | blastp Best-Hit cut-off (0.001) Number       | Best-Hit Accession | % Gaps | % Identities | % Positives | E-value  | Predicted Function   |
|------------|------------|-----------|--------|--------|----------------------------------------------|--------------------|--------|--------------|-------------|----------|----------------------|
| ORF1       | 313        | 1884      | 1572   | +      | AAA family ATPase<br>Pediococcus pentosaceus | WP_055126681       | 10     | 30           | 49          | 3.60E-51 | recombinase recD CDS |

|       |       |       |      |   |                                                                                               |              |   |    |    |           |                                                                                   |
|-------|-------|-------|------|---|-----------------------------------------------------------------------------------------------|--------------|---|----|----|-----------|-----------------------------------------------------------------------------------|
| ORF2  | 1982  | 3919  | 1938 | + | hypothetical protein<br>Enterococcus phage VFW                                                | SCZ83951     | 0 | 71 | 84 | 0.00E+00  | recD-like DNA helicase<br>CDS                                                     |
| ORF3  | 3912  | 4460  | 549  | + | None                                                                                          |              |   |    |    |           | hypothetical protein                                                              |
| ORF4  | 4596  | 4925  | 330  | + | hypothetical protein<br>Enterococcus phage<br>VPE25                                           | SCO93385     | 0 | 57 | 82 | 3.72E-37  | hypothetical protein CDS                                                          |
| ORF5  | 4922  | 5386  | 465  | + | hypothetical protein<br>Enterococcus phage<br>VPE25                                           | SCO93386     | 0 | 65 | 83 | 9.58E-64  | hypothetical protein CDS                                                          |
| ORF6  | 5386  | 5790  | 405  | + | None                                                                                          |              |   |    |    |           | hypothetical protein CDS                                                          |
| ORF7  | 5787  | 7073  | 1287 | + | DNA ligase phage-<br>associated Enterococcus<br>phage VPE25                                   | SCO93389     | 0 | 70 | 83 | 0.00E+00  | DNA ligase, phage-<br>associated CDS                                              |
| ORF8  | 7070  | 7258  | 189  | + | None                                                                                          |              |   |    |    |           | hypothetical protein CDS                                                          |
| ORF9  | 7354  | 7545  | 192  | + | hypothetical protein<br>Enterococcus phage<br>VPE25                                           | SCO93390     | 0 | 57 | 74 | 6.76E-15  | hypothetical protein CDS                                                          |
| ORF10 | 7532  | 7747  | 216  | + |                                                                                               |              |   |    |    |           | hypothetical protein CDS                                                          |
| ORF11 | 7728  | 7919  | 192  | + |                                                                                               |              |   |    |    |           | hypothetical protein CDS                                                          |
| ORF12 | 8088  | 8294  | 207  | + |                                                                                               |              |   |    |    |           | hypothetical protein CDS                                                          |
| ORF13 | 8446  | 8703  | 258  | + |                                                                                               |              |   |    |    |           | hypothetical protein CDS                                                          |
| ORF14 | 8843  | 9364  | 522  | + | Lysine decarboxylase<br>family Enterococcus phage<br>VFW                                      | SCZ83963     | 1 | 61 | 80 | 1.31E-67  | Lysine decarboxylase<br>family CDS                                                |
| ORF15 | 9379  | 10026 | 648  | + | Enterococcus phage<br>VPE25                                                                   | SCO93397     | 6 | 59 | 69 | 4.10E-79  | Purine trans<br>deoxyribosylase<br>Nucleoside<br>deoxyribosyltransferase-I<br>CDS |
| ORF16 | 10143 | 10991 | 849  | + | Deoxyguanosine kinase<br>Enterococcus phage VFW                                               | SCZ83966     | 0 | 52 | 71 | 1.06E-93  | Deoxyguanosine kinase<br>CDS                                                      |
| ORF17 | 11015 | 11779 | 765  | + | NrdR-regulated<br>deoxyribonucleotide<br>transporter PnuC-like<br>Enterococcus phage<br>VPE25 | SCO93399     | 0 | 87 | 94 | 5.69E-156 | NrdR-regulated<br>deoxyribonucleotide<br>transporter PnuC-like<br>CDS             |
| ORF18 | 11865 | 12071 | 207  | + | glutaredoxin-like protein<br>NrdH Enterococcus canis                                          | WP_082703267 | 3 | 46 | 62 | 5.38E-10  | NrdH-like glutaredoxin<br>CDS                                                     |
| ORF19 | 12146 | 13189 | 1044 | + | hypothetical protein<br>Enterococcus phage<br>VPE25                                           | SCO93402     | 1 | 62 | 79 | 7.90E-154 | DNA response regulator<br>CDS                                                     |
| ORF20 | 13278 | 14126 | 849  | + | hypothetical protein<br>Enterococcus phage<br>VPE25                                           | SCO93403     | 1 | 61 | 78 | 2.58E-118 | HNH endonuclease CDS                                                              |



|       |       |       |      |   |                                                                                                     |              |    |    |    |           |                                                          |
|-------|-------|-------|------|---|-----------------------------------------------------------------------------------------------------|--------------|----|----|----|-----------|----------------------------------------------------------|
| ORF21 | 14119 | 14712 | 594  | + |                                                                                                     |              |    |    |    |           | hypothetical protein CDS                                 |
| ORF22 | 14726 | 14926 | 201  | + |                                                                                                     |              |    |    |    |           | hypothetical protein CDS                                 |
| ORF23 | 15020 | 15982 | 963  | + | hypothetical protein<br>Enterococcus phage VFW                                                      | SCZ83974     | 2  | 73 | 85 | 5.99E-167 | single strand binding<br>protein CDS                     |
| ORF24 | 16056 | 16523 | 468  | + | hypothetical protein<br>Enterococcus phage VFW                                                      | SCZ83975     | 3  | 24 | 54 | 1.66E-05  | hypothetical protein CDS                                 |
| ORF25 | 16525 | 16941 | 417  | + |                                                                                                     |              |    |    |    |           | hypothetical protein CDS                                 |
| ORF26 | 17016 | 18083 | 1068 | + | hypothetical protein<br>Enterococcus phage<br>VPE25                                                 | SCO93409     | 0  | 85 | 92 | 0.00E+00  | ATP GTP binding protein<br>CDS                           |
| ORF27 | 18141 | 18830 | 690  | + |                                                                                                     |              |    |    |    |           | hypothetical protein CDS                                 |
| ORF28 | 18820 | 19020 | 201  | + |                                                                                                     |              |    |    |    |           | hypothetical protein CDS                                 |
| ORF29 | 19017 | 19757 | 741  | + | hypothetical protein<br>Enterococcus phage<br>VPE25                                                 | SCO93413     | 1  | 51 | 69 | 1.65E-79  | hypothetical protein CDS                                 |
| ORF30 | 19837 | 20013 | 177  | + | hypothetical protein<br>SSG_02354 Enterococcus<br>faecium EnGen0190                                 | EOH43274     | 0  | 82 | 91 | 7.54E-28  | hypothetical protein CDS                                 |
| ORF31 | 20023 | 20259 | 237  | + | hypothetical protein<br>Peptostreptococcus sp.<br>MV1                                               | WP_052045454 | 10 | 55 | 71 | 7.14E-21  | hypothetical protein CDS                                 |
| ORF32 | 20351 | 20854 | 504  | + | phage protein Enterococcus<br>phage VPE25                                                           | SCO93419     | 0  | 70 | 83 | 7.69E-82  | hypothetical protein CDS                                 |
| ORF33 | 20851 | 22431 | 1581 | + | Replicative DNA helicase<br>DnaB Enterococcus phage<br>VPE25                                        | SCO93420     | 0  | 82 | 93 | 0.00E+00  | Replicative DNA helicase<br>DnaB CDS                     |
| ORF34 | 22444 | 23493 | 1050 | + | Phage toprim domain<br>containing protein YorJ<br>B.subtilis homolog<br>Enterococcus phage<br>VPE25 | SCO93421     | 0  | 70 | 86 | 0.00E+00  | DNA primase CDS                                          |
| ORF35 | 23505 | 25328 | 1824 | + | Single-stranded-DNA-<br>specific exonuclease RecJ<br>Enterococcus phage<br>VPE25                    | SCO93422     | 2  | 60 | 76 | 0.00E+00  | Single-stranded-DNA-<br>specific exonuclease<br>RecJ CDS |
| ORF36 | 25413 | 25988 | 576  | + | hypothetical protein<br>Enterococcus phage<br>VPE25                                                 | SCO93423     | 6  | 36 | 59 | 1.01E-28  | hypothetical protein CDS                                 |
| ORF37 | 26176 | 26355 | 180  | + |                                                                                                     |              |    |    |    |           | hypothetical protein CDS                                 |
| ORF38 | 26352 | 26690 | 339  | + |                                                                                                     |              |    |    |    |           | hypothetical protein CDS                                 |
| ORF39 | 26695 | 27207 | 513  | + |                                                                                                     |              |    |    |    |           | hypothetical protein CDS                                 |
| ORF40 | 27245 | 27394 | 150  | + |                                                                                                     |              |    |    |    |           | hypothetical protein CDS                                 |

|       |       |       |      |   |                                                                                       |              |   |    |    |           |                                                                         |
|-------|-------|-------|------|---|---------------------------------------------------------------------------------------|--------------|---|----|----|-----------|-------------------------------------------------------------------------|
| ORF41 | 27472 | 27702 | 231  | + |                                                                                       |              |   |    |    |           | hypothetical protein CDS                                                |
| ORF42 | 27727 | 27870 | 144  | + | hypothetical protein<br>Enterococcus phage<br>VPE25                                   | SCO93428     | 0 | 67 | 87 | 4.92E-14  | hypothetical protein CDS                                                |
| ORF43 | 28004 | 28522 | 519  | + | hypothetical protein<br>Enterococcus phage<br>VPE25                                   | SCO93430     | 7 | 47 | 64 | 3.36E-35  | DTMP kinase, thymidylate<br>kinase CDS                                  |
| ORF44 | 28523 | 29356 | 834  | + | Thymidylate synthase<br>Enterococcus phage<br>VPE25                                   | SCO93431     | 1 | 55 | 73 | 5.74E-103 | Thymidylate synthase<br>CDS                                             |
| ORF45 | 29340 | 29756 | 417  | + | Deoxyuridine 5-<br>triphosphate<br>nucleotidohydrolase<br>Enterococcus phage<br>VPE25 | SCO93432     | 0 | 78 | 90 | 1.59E-75  | Deoxyuridine 5-<br>triphosphate<br>nucleotidohydrolase CDS              |
| ORF46 | 29756 | 30100 | 345  | + | HAD hydrolase family<br>protein Longirhabdus<br>pacificica                            | WP_128894611 | 3 | 50 | 68 | 5.41E-31  | HAD hydrolase family<br>protein CDS                                     |
| ORF47 | 30097 | 31731 | 1635 | + | hypothetical protein<br>A2138_23700<br>Deltaproteobacteria<br>bacterium RBG_16_71_12  | OGQ17127     | 7 | 33 | 52 | 4.86E-83  | nucleoside-diphosphate-<br>sugar pyrophosphorylase-<br>like protein CDS |
| ORF48 | 31736 | 32956 | 1221 | + | hypothetical protein<br>CBD54_002560<br>Alphaproteobacteria<br>bacterium TMED194      | RPH07865     | 6 | 30 | 50 | 5.41E-45  | hypothetical protein CDS                                                |
| ORF49 | 33043 | 33567 | 525  | + | Ribonuclease HI<br>Enterococcus phage<br>VPE25                                        | SCO93434     | 0 | 87 | 93 | 1.14E-107 | Ribonuclease HI CDS                                                     |
| ORF50 | 33564 | 34535 | 972  | + | Nucleotide sugar<br>synthetase-like protein<br>Enterococcus phage<br>VPE25;           | SCO93435     | 1 | 48 | 68 | 5.98E-98  | Nucleotide sugar<br>synthetase-like protein<br>CDS                      |
| ORF51 | 34525 | 34779 | 255  | + |                                                                                       |              |   |    |    |           | hypothetical protein CDS                                                |
| ORF52 | 34772 | 35380 | 609  | + | hypothetical protein<br>Enterococcus phage<br>VPE25                                   | SCO93436     | 1 | 52 | 68 | 1.03E-19  | Thymidine kinase CDS                                                    |
| ORF53 | 35460 | 39314 | 3855 | + | DNA polymerase III alpha<br>subunit Enterococcus<br>phage VFW                         | SCZ84010     | 0 | 78 | 89 | 0.00E+00  | DNA polymerase III alpha<br>subunit CDS                                 |
| ORF54 | 39381 | 39644 | 264  | + | hypothetical protein<br>Enterococcus phage<br>VPE25                                   | SCO93444     | 1 | 35 | 57 | 9.42E-08  | hypothetical protein CDS                                                |
| ORF55 | 39641 | 39919 | 279  | + |                                                                                       |              |   |    |    |           | hypothetical protein CDS                                                |
| ORF56 | 40197 | 40610 | 414  | - |                                                                                       |              |   |    |    |           | hypothetical protein CDS                                                |

|       |       |       |      |   |                                                                                                      |              |   |    |    |           |                                                                   |
|-------|-------|-------|------|---|------------------------------------------------------------------------------------------------------|--------------|---|----|----|-----------|-------------------------------------------------------------------|
| ORF57 | 40850 | 41422 | 573  | + | hypothetical protein<br>Enterococcus phage VFW                                                       | SCZ84015     | 9 | 32 | 50 | 2.72E-07  | hypothetical protein CDS                                          |
| ORF58 | 41412 | 41699 | 288  | + |                                                                                                      |              |   |    |    |           | hypothetical protein CDS                                          |
| ORF59 | 41744 | 41962 | 219  | + | hypothetical protein Bacillus<br>cereus                                                              | WP_073526565 | 3 | 70 | 80 | 3.62E-27  | DUF2829 domain-<br>containing protein CDS                         |
| ORF60 | 41962 | 42705 | 744  | + | Deoxyuridine 5-<br>triphosphate<br>nucleotidohydrolase<br>Enterococcus phage<br>VPE25                | SCO93451     | 3 | 58 | 72 | 1.68E-83  | Deoxyuridine 5-<br>triphosphate<br>nucleotidohydrolase CDS        |
| ORF61 | 42706 | 43005 | 300  | + |                                                                                                      |              |   |    |    |           | hypothetical protein CDS                                          |
| ORF62 | 42995 | 43594 | 600  | + | Guanylate kinase<br>Enterococcus phage<br>VPE25                                                      | SCO93453     | 5 | 41 | 65 | 5.56E-40  | Guanylate kinase CDS                                              |
| ORF63 | 43595 | 44179 | 585  | + | non-essential protein<br>Enterococcus phage<br>VPE25                                                 | SCO93454     | 0 | 75 | 90 | 5.21E-103 | RusA family crossover<br>junction<br>endodeoxyribonuclease<br>CDS |
| ORF64 | 44148 | 44531 | 384  | + |                                                                                                      |              |   |    |    |           | hypothetical protein CDS                                          |
| ORF65 | 44946 | 45575 | 630  | + | hypothetical protein<br>Enterococcus phage<br>VPE25                                                  | SCO93459     | 1 | 53 | 74 | 3.72E-73  | sigma-70 family RNA<br>polymerase sigma factor<br>CDS             |
| ORF66 | 45677 | 47614 | 1938 | + | DNA gyrase subunit B<br>Enterococcus phage<br>VPE25                                                  | SCO93463     |   |    |    | 0.00E+00  | Topoisomerase IV subunit<br>B CDS                                 |
| ORF67 | 47709 | 47966 | 258  | + |                                                                                                      |              |   |    |    |           | hypothetical protein CDS                                          |
| ORF68 | 47959 | 49962 | 2004 | + | DNA gyrase subunit A<br>Enterococcus phage VFW                                                       | SCZ84033     | 2 | 60 | 77 | 0.00E+00  | DNA topoisomerase IV<br>subunit A CDS                             |
| ORF69 | 50114 | 50290 | 177  | + |                                                                                                      |              |   |    |    |           | hypothetical protein CDS                                          |
| ORF70 | 50393 | 50623 | 231  | + |                                                                                                      |              |   |    |    |           | hypothetical protein CDS                                          |
| ORF71 | 50820 | 51230 | 411  | + |                                                                                                      |              |   |    |    |           | hypothetical protein CDS                                          |
| ORF72 | 51220 | 51531 | 312  | + |                                                                                                      |              |   |    |    |           | hypothetical protein CDS                                          |
| ORF73 | 51528 | 52100 | 573  | + |                                                                                                      |              |   |    |    |           | hypothetical protein CDS                                          |
| ORF74 | 52217 | 52405 | 189  | + |                                                                                                      |              |   |    |    |           | hypothetical protein CDS                                          |
| ORF75 | 52431 | 52904 | 474  | + |                                                                                                      |              |   |    |    |           | hypothetical protein CDS                                          |
| ORF76 | 52921 | 53103 | 183  | + |                                                                                                      |              |   |    |    |           | hypothetical protein CDS                                          |
| ORF77 | 53139 | 54116 | 978  | - | prophage LambdaBa02<br>site-specific recombinase<br>phage integrase family<br>Enterococcus phage VFW | SCZ84050     | 0 | 86 | 92 | 0.00E+00  | site-specific recombinase<br>phage integrase family<br>CDS        |

|       |       |       |      |   |                                                                        |              |    |    |    |           |                                                             |
|-------|-------|-------|------|---|------------------------------------------------------------------------|--------------|----|----|----|-----------|-------------------------------------------------------------|
| ORF78 | 54176 | 55339 | 1164 | - | N-acetylmuramoyl-L-alanine amidase<br>Enterococcus phage VPE25         | SCO93486     | 11 | 48 | 59 | 1.91E-102 | N-acetylmuramoyl-L-alanine amidase CDS                      |
| ORF79 | 55451 | 55810 | 360  | - | hypothetical protein<br>Enterococcus phage VPE25                       | SCO93487     | 0  | 67 | 84 | 8.04E-52  | holin CDS                                                   |
| ORF80 | 55810 | 56181 | 372  | - | hypothetical protein<br>Enterococcus phage VPE25                       | SCO93488     | 0  | 72 | 84 | 8.92E-40  | hypothetical protein CDS                                    |
| ORF81 | 56159 | 56557 | 399  | - | hypothetical protein<br>Enterococcus phage VPE25                       | SCO93489     | 0  | 61 | 83 | 8.36E-57  | hypothetical protein CDS                                    |
| ORF82 | 56564 | 56698 | 135  | - |                                                                        |              |    |    |    |           | hypothetical protein CDS                                    |
| ORF83 | 56701 | 57186 | 486  | - | hypothetical protein<br>Enterococcus faecalis                          | WP_010774487 | 12 | 42 | 56 | 1.77E-18  | hypothetical protein CDS                                    |
| ORF84 | 57207 | 60089 | 2883 | - | BppU family phage<br>baseplate upper protein<br>Enterococcus faecium   | WP_104807894 | 4  | 53 | 68 | 0.00E+00  | BppU family phage<br>baseplate upper protein<br>CDS         |
| ORF85 | 60103 | 64134 | 4032 | - | hypothetical protein<br>Enterococcus faecium                           | WP_142972363 | 6  | 48 | 59 | 4.22E-150 | minor tail protein CDS                                      |
| ORF86 | 64164 | 66476 | 2313 | - | hypothetical protein<br>Enterococcus faecalis                          | WP_057086899 | 8  | 48 | 63 | 0.00E+00  | Phage endopeptidase,<br>tail-spike protein CDS              |
| ORF87 | 66473 | 67264 | 792  | - | hypothetical protein<br>Enterococcus phage VPE25                       | SCO93493     | 0  | 62 | 78 | 9.10E-121 | Phage tail protein CDS                                      |
| ORF88 | 67277 | 71119 | 3843 | - | Phage tail length tape-<br>measure protein<br>Enterococcus phage VPE25 | SCO93494     | 2  | 54 | 72 | 0.00E+00  | Phage tail length tape-<br>measure protein CDS              |
| ORF89 | 71373 | 71705 | 333  | - | hypothetical protein<br>Enterococcus phage VPE25                       | SCO93496     | 0  | 76 | 90 | 1.98E-53  | hypothetical protein CDS                                    |
| ORF90 | 71872 | 72480 | 609  | - | Phage major tail protein<br>phi13 Enterococcus phage VFW               | SCZ84062     | 0  | 89 | 92 | 2.55E-107 | Phage major tail protein,<br>phage 13 family CDS            |
| ORF91 | 72504 | 72881 | 378  | - | hypothetical protein<br>Enterococcus phage VPE25                       | SCO93498     | 0  | 84 | 90 | 2.68E-69  | hypothetical protein CDS                                    |
| ORF92 | 72884 | 73333 | 450  | - | hypothetical protein<br>Enterococcus phage VPE25                       | SCO93499     | 0  | 71 | 80 | 4.30E-70  | Phage head-tail joining<br>protein, HK97 gp10 family<br>CDS |
| ORF93 | 73326 | 73679 | 354  | - | hypothetical protein<br>Enterococcus phage VPE25                       | SCO93500     | 0  | 78 | 92 | 1.49E-60  | Phage head-tail adaptor<br>protein CDS                      |
| ORF94 | 73683 | 74060 | 378  | - | hypothetical protein<br>Enterococcus phage VPE25                       | SCO93501     | 0  | 72 | 85 | 9.18E-61  | Phage head-tail<br>connector protein CDS                    |

|        |       |       |      |   |                                                        |              |    |    |    |           |                                                  |
|--------|-------|-------|------|---|--------------------------------------------------------|--------------|----|----|----|-----------|--------------------------------------------------|
| ORF95  | 74200 | 75069 | 870  | - | prophage pi2 protein 34<br>Enterococcus phage<br>VPE25 | SCO93502     | 0  | 68 | 81 | 6.18E-141 | Prophage pi2 protein 34<br>CDS                   |
| ORF96  | 75270 | 76475 | 1206 | - | hypothetical protein<br>Enterococcus phage VFW         | SCZ84068     | 1  | 79 | 87 | 0.00E+00  | Phage major capsid<br>protein CDS                |
| ORF97  | 76465 | 77673 | 1209 | - | hypothetical protein<br>Enterococcus phage VFW         | SCZ84069     | 3  | 61 | 71 | 3.51E-150 | Phage prohead protease,<br>HK97 family CDS       |
| ORF98  | 77688 | 78965 | 1278 | - | hypothetical protein<br>Enterococcus phage<br>VPE25    | SCO93505     | 0  | 77 | 89 | 0.00E+00  | Phage portal protein CDS                         |
| ORF99  | 78978 | 80684 | 1707 | - | hypothetical protein<br>Enterococcus phage VFW         | SCZ84071     | 0  | 85 | 92 | 0.00E+00  | Phage terminase large<br>subunit CDS             |
| ORF100 | 81115 | 81606 | 492  | - | Phage-related protein<br>Enterococcus phage<br>VPE25   | SCO93509     | 0  | 86 | 96 | 4.62E-101 | Phage terminase small<br>subunit, P27 family CDS |
| ORF101 | 81609 | 82220 | 612  | - | hypothetical protein Bacillus                          | WP_063263132 | 14 | 38 | 51 | 5.16E-12  | GIY-YIG homing<br>endonuclease CDS               |
| ORF102 | 82217 | 82636 | 420  | - | hypothetical protein<br>Enterococcus phage<br>VPE25    | SCO93510     | 3  | 59 | 78 | 1.57E-54  | HNH endonuclease CDS                             |
| ORF103 | 82611 | 82769 | 159  | - |                                                        |              |    |    |    |           | hypothetical protein CDS                         |
| ORF104 | 82955 | 83212 | 258  | + |                                                        |              |    |    |    |           | hypothetical protein CDS                         |
| ORF105 | 83214 | 83657 | 444  | + |                                                        |              |    |    |    |           | hypothetical protein CDS                         |
| ORF106 | 83654 | 84031 | 378  | + |                                                        |              |    |    |    |           | hypothetical protein CDS                         |
| ORF107 | 84028 | 84219 | 192  | + |                                                        |              |    |    |    |           | hypothetical protein CDS                         |
| ORF108 | 84216 | 84497 | 282  | + |                                                        |              |    |    |    |           | hypothetical protein CDS                         |
| ORF109 | 84526 | 85398 | 873  | + | hypothetical protein<br>Enterococcus phage<br>VPE25    | SCO93512     | 3  | 42 | 62 | 2.53E-63  | hypothetical protein CDS                         |

**Table S1C. *Enterococcus faecium* phage 9184 genome organization and features**

**Phage 9184 genome annotation**

| Feature ID | Gene Start | Gene Stop | Length | Strand | blastp Best-Hit cut-off (0.001) Number                      | Best-Hit Accession | % Gaps | % Identities | % Positives | E-value  | Predicted Function      |
|------------|------------|-----------|--------|--------|-------------------------------------------------------------|--------------------|--------|--------------|-------------|----------|-------------------------|
| ORF1       | 260        | 439       | 180    | +      | hypothetical protein<br>Enterococcus phage<br>vB_EfaS-DELFI | BBQ04339           | 0      | 78           | 85          | 2.55E-25 | hypothetical protein    |
| ORF2       | 444        | 902       | 459    | +      | terminase small subunit<br>Enterococcus phage IME-<br>EFm5  | YP_009200920       | 1      | 78           | 86          | 3.11E-76 | terminase small subunit |

|       |       |       |      |   |                                                                                    |              |   |    |    |           |                                              |
|-------|-------|-------|------|---|------------------------------------------------------------------------------------|--------------|---|----|----|-----------|----------------------------------------------|
| ORF3  | 1545  | 3323  | 1779 | + | terminase large subunit<br>Enterococcus phage IME-<br>EFm1                         | YP_009042651 | 0 | 94 | 98 | 0         | terminase large subunit                      |
| ORF4  | 3391  | 3567  | 177  | + | sensor histidine kinase<br>Enterococcus phage IME-<br>EFm1                         | YP_009042652 | 0 | 97 | 98 | 2.96E-30  | sensor histidine kinase                      |
| ORF5  | 3571  | 4776  | 1206 | + | portal protein Enterococcus<br>phage IME-EFm5                                      | YP_009200917 | 0 | 81 | 90 | 0.00E+00  | portal protein                               |
| ORF6  | 4784  | 5278  | 495  | + | prohead protease<br>Enterococcus phage IME-<br>EFm5                                | YP_009200916 | 0 | 95 | 99 | 1.88E-105 | prohead protease                             |
| ORF7  | 5348  | 6595  | 1248 | + | capsid protein<br>Enterococcus phage<br>Nonaheksakonda                             | AZS06457     | 6 | 61 | 76 | 3.10E-162 | capsid protein                               |
| ORF8  | 6675  | 7013  | 339  | + | head-tail joining protein<br>Enterococcus phage IME-<br>EFm5                       | YP_009200913 | 0 | 79 | 91 | 2.64E-61  | head-tail connector<br>protein               |
| ORF9  | 6943  | 7278  | 336  | + | head-tail adaptor protein<br>Enterococcus phage IME-<br>EFm1                       | YP_009042657 | 0 | 95 | 96 | 7.59E-71  | head-tail adaptor protein                    |
| ORF10 | 7280  | 7651  | 372  | + | head-tail joining protein<br>Enterococcus phage IME-<br>EFm5                       | YP_009200912 | 0 | 89 | 93 | 4.06E-74  | head-tail joining protein                    |
| ORF11 | 7651  | 8016  | 366  | + | head-tail joining protein<br>Enterococcus phage IME-<br>EFm5                       | YP_009200911 | 0 | 87 | 94 | 1.97E-71  | head-tail joining protein                    |
| ORF12 | 8089  | 8649  | 561  | + | major tail protein<br>Enterococcus phage IME-<br>EFm1                              | YP_009042660 | 1 | 87 | 95 | 1.35E-113 | major tail protein                           |
| ORF13 | 8708  | 9088  | 381  | + | putative tail tape measure<br>chaperone protein<br>Enterococcus phage IME-<br>EFm5 | YP_009200909 | 0 | 81 | 93 | 2.90E-56  | tail tape measure protein                    |
| ORF14 | 9121  | 9318  | 198  | + | tail tape measure<br>chaperone protein<br>Enterococcus phage IME-<br>EFm1          | YP_009042662 | 0 | 89 | 97 | 2.11E-35  | tail tape measure<br>chaperone protein       |
| ORF15 | 9383  | 13873 | 4491 | + | transglycosylase SLT<br>domain-containing protein<br>Enterococcus durans           | WP_119219106 | 1 | 75 | 85 | 0.00E+00  | tail length tape-measure<br>protein          |
| ORF16 | 13945 | 14967 | 1023 | + | minor tail protein<br>Enterococcus phage IME-<br>EFm5                              | YP_009200906 | 0 | 92 | 97 | 0.00E+00  | minor tail protein                           |
| ORF17 | 14954 | 17174 | 240  | + | minor tail protein<br>Enterococcus phage IME-<br>EFm5                              | YP_009200906 | 0 | 71 | 81 | 0.00E+00  | BppU family phage<br>baseplate upper protein |
| ORF18 | 17247 | 18650 | 1404 | + | minor tail protein<br>Enterococcus phage IME-<br>EFm5                              | YP_009200905 | 1 | 75 | 86 | 0.00E+00  | minor tail protein                           |

|       |       |       |      |   |                                                                                 |              |   |    |    |           |                                          |
|-------|-------|-------|------|---|---------------------------------------------------------------------------------|--------------|---|----|----|-----------|------------------------------------------|
| ORF19 | 18665 | 19651 | 987  | + | tail assembly protein<br>Enterococcus phage IME-<br>EFm5                        | YP_009200904 | 2 | 58 | 72 | 1.74E-110 | tail assembly protein                    |
| ORF20 | 19830 | 20108 | 279  | + | holin Enterococcus phage<br>IME-EFm1                                            | YP_009042670 | 0 | 97 | 99 | 1.24E-57  | holin                                    |
| ORF21 | 20122 | 20403 | 282  | + | holin Enterococcus phage<br>IME-EFm5                                            | YP_009200902 | 0 | 98 | 99 | 2.26E-58  | holin                                    |
| ORF22 | 20420 | 21445 | 1026 | + | N-acetylmuramoyl-L-<br>alanine amidase<br>Enterococcus phage IME-<br>EFm5       | YP_009200901 | 0 | 95 | 96 | 0.00E+00  | N-acetylmuramoyl-L-<br>alanine amidase   |
| ORF23 | 21524 | 22219 | 696  | - | hypothetical protein<br>EFm5_30 Enterococcus<br>phage IME-EFm5                  | YP_009200900 | 0 | 90 | 95 | 3.40E-150 | Deoxyguanosine kinase                    |
| ORF24 | 22517 | 23347 | 831  | - | hypothetical protein<br>phiSHEF2_24<br>Enterococcus phage<br>phiSHEF2           | YP_009613304 | 0 | 63 | 80 | 8.82E-24  | DNA polymerase                           |
| ORF25 | 23314 | 23958 | 645  | - | hypothetical protein<br>Streptococcus pyogenes                                  | WP_136291116 | 6 | 33 | 57 | 5.20E-27  | ABC transporter ATP-<br>binding protein  |
| ORF26 | 24003 | 26033 | 2031 | - | DNA polymerase<br>Enterococcus phage<br>vB_EfaS-DELFI                           | BBQ04302     | 1 | 62 | 77 | 0.00E+00  | DNA polymerase                           |
| ORF27 | 26142 | 26348 | 207  | - | hypothetical protein<br>Enterococcus phage<br>vB_EfaS-DELFI                     | BBQ04303     | 0 | 65 | 78 | 1.57E-24  | hypothetical protein                     |
| ORF28 | 26455 | 27240 | 786  | - | hypothetical protein<br>IME_032 Enterococcus<br>phage IME-EFm1                  | YP_009042680 | 5 | 50 | 71 | 3.54E-71  | hypothetical protein                     |
| ORF29 | 27299 | 27517 | 219  | - |                                                                                 |              |   |    |    |           | hypothetical protein                     |
| ORF30 | 27514 | 28323 | 810  | - | hypothetical protein<br>EFm5_22 Enterococcus<br>phage IME-EFm5                  | YP_009200892 | 0 | 78 | 87 | 1.61E-146 | Protein of unknown<br>function DUF1351   |
| ORF31 | 28313 | 28483 | 171  | - | hypothetical protein<br>IME_035 Enterococcus<br>phage IME-EFm1                  | YP_009042683 | 0 | 89 | 93 | 9.29E-26  | hypothetical protein                     |
| ORF32 | 28480 | 28701 | 222  | - |                                                                                 |              |   |    |    |           | hypothetical protein                     |
| ORF33 | 28701 | 28928 | 228  | - | hypothetical protein<br>EFm5_20 Enterococcus<br>phage IME-EFm5                  | YP_009200890 | 0 | 92 | 97 | 1.47E-42  | hypothetical protein                     |
| ORF34 | 29107 | 29436 | 330  | - | hypothetical protein<br>IME_030 Enterococcus<br>phage IME-EFm1                  | YP_009042678 | 3 | 51 | 72 | 9.10E-32  | hypothetical protein                     |
| ORF35 | 29474 | 30235 | 762  | - | metallo-beta-lactamase<br>domain protein<br>Enterococcus phage<br>vB_EfaS-DELFI | BBQ04313     | 0 | 74 | 86 | 1.26E-131 | Metallo-beta-lactamase<br>domain protein |

|       |       |       |      |   |                                                                     |              |   |    |    |           |                                      |
|-------|-------|-------|------|---|---------------------------------------------------------------------|--------------|---|----|----|-----------|--------------------------------------|
| ORF36 | 30210 | 30680 | 471  | - | HNH homing endonuclease-like protein Enterococcus phage IME-EFm5    | YP_009200887 | 0 | 79 | 92 | 1.55E-90  | HNH homing endonuclease-like protein |
| ORF37 | 30670 | 31161 | 492  | - | hypothetical protein IME_041 Enterococcus phage IME-EFm1            | YP_009042689 | 2 | 61 | 73 | 1.33E-55  | hypothetical protein                 |
| ORF38 | 31301 | 31501 | 201  | - | hypothetical protein EFm5_15 Enterococcus phage IME-EFm5            | YP_009200885 | 0 | 86 | 97 | 4.58E-36  | hypothetical protein                 |
| ORF39 | 31501 | 31680 | 180  | - | hypothetical protein EFm5_14 Enterococcus phage IME-EFm5            | YP_009200884 | 0 | 66 | 76 | 6.47E-18  | hypothetical protein                 |
| ORF40 | 31677 | 32417 | 741  | - | DNA replication protein Enterococcus phage IME-EFm5                 | YP_009200883 | 0 | 82 | 91 | 2.59E-150 | bifunctional DNA primase-polymerase  |
| ORF41 | 32414 | 33154 | 741  | - | adenine-specific methyltransferase Enterococcus phage vB_EfaS_Ef5.4 | QBZ69846     | 2 | 63 | 79 | 7.63E-108 | DNA methylase                        |
| ORF42 | 33210 | 33368 | 159  | - | hypothetical protein Enterococcus phage vB_EfaS-DELf1               | BBQ04319     | 7 | 71 | 82 | 1.93E-17  | hypothetical protein                 |
| ORF43 | 33365 | 34642 | 1278 | - | helicase Enterococcus phage IME-EFm5                                | YP_009200880 | 0 | 90 | 95 | 0.00E+00  | DNA helicase                         |
| ORF44 | 34639 | 34914 | 276  | - | hypothetical protein EFm5_08 Enterococcus phage IME-EFm5            | YP_009200878 | 2 | 77 | 90 | 1.21E-44  | putative RNA-binding protein         |
| ORF45 | 34914 | 35030 | 117  | - | hypothetical protein EFm5_07 Enterococcus phage IME-EFm5            | YP_009200877 | 0 | 61 | 79 | 4.99E-07  | hypothetical protein                 |
| ORF46 | 35027 | 35194 | 168  | - | hypothetical protein EFm5_06 Enterococcus phage IME-EFm5            | YP_009200876 | 0 | 73 | 85 | 3.36E-20  | hypothetical protein                 |
| ORF47 | 35187 | 35537 | 351  | - | endonuclease Enterococcus phage IME-EFm5                            | YP_009200875 | 0 | 93 | 98 | 5.11E-74  | Endonuclease                         |
| ORF48 | 35534 | 35749 | 216  | - |                                                                     |              |   |    |    |           | hypothetical protein                 |
| ORF49 | 35746 | 35973 | 228  | - | hypothetical protein EFm5_03 Enterococcus phage IME-EFm5            | YP_009200873 | 1 | 66 | 83 | 9.04E-21  | hypothetical protein                 |
| ORF50 | 35963 | 36055 | 93   | - |                                                                     |              |   |    |    |           | hypothetical protein                 |
| ORF51 | 36055 | 36252 | 198  | - |                                                                     |              |   |    |    |           | hypothetical protein                 |
| ORF52 | 36249 | 36464 | 216  | - |                                                                     |              |   |    |    |           | hypothetical protein                 |
| ORF53 | 36461 | 36658 | 198  | - |                                                                     |              |   |    |    |           | hypothetical protein                 |



|       |       |       |      |   |                                                          |              |    |    |    |          |                                    |
|-------|-------|-------|------|---|----------------------------------------------------------|--------------|----|----|----|----------|------------------------------------|
| ORF54 | 36735 | 38357 | 1623 | - | DNA primase Enterococcus phage vB_EfaS-DELFI             | BBQ04327     | 9  | 31 | 51 | 3.86E-50 | DNA primase                        |
| ORF55 | 38404 | 38607 | 204  | - | hypothetical protein Enterococcus phage vB_EfaS-DELFI    | BBQ04330     | 6  | 60 | 72 | 1.27E-12 | hypothetical protein               |
| ORF56 | 38678 | 38860 | 183  | - | hypothetical protein EFm5_68 Enterococcus phage IME-EFm5 | YP_009200938 | 0  | 82 | 95 | 1.09E-28 | putative swarming motility protein |
| ORF57 | 38853 | 39032 | 180  | - | hypothetical protein EFm5_67 Enterococcus phage IME-EFm5 | YP_009200937 | 0  | 64 | 83 | 3.69E-19 | hypothetical protein               |
| ORF58 | 39032 | 39535 | 504  | - | hypothetical protein EFm5_66 Enterococcus phage IME-EFm5 | YP_009200936 | 0  | 75 | 86 | 4.21E-28 | tail length tape-measure protein   |
| ORF59 | 39601 | 39831 | 231  | - | hypothetical protein CUN38_04900 Enterococcus faecium    | PQC93482     | 0  | 80 | 89 | 2.27E-34 | hypothetical protein               |
| ORF60 | 39831 | 40040 | 210  | - |                                                          |              |    |    |    |          | hypothetical protein               |
| ORF61 | 40056 | 40238 | 183  | - | hypothetical protein Enterococcus faecalis               | WP_033659461 | 0  | 58 | 77 | 5.57E-14 | hypothetical protein               |
| ORF62 | 40251 | 40613 | 363  | - | hypothetical protein IME_057 Enterococcus phage IME-EFm1 | YP_009042705 | 0  | 71 | 87 | 4.63E-42 | hypothetical protein               |
| ORF63 | 40625 | 40951 | 327  | - | hypothetical protein IME_059 Enterococcus phage IME-EFm1 | YP_009042707 | 0  | 82 | 91 | 1.40E-58 | DUF1140 protein                    |
| ORF64 | 40945 | 41178 | 234  | - | hypothetical protein IME_060 Enterococcus phage IME-EFm1 | YP_009042708 | 1  | 60 | 81 | 5.08E-24 | hypothetical protein               |
| ORF65 | 41234 | 41467 | 234  | - |                                                          |              |    |    |    |          | hypothetical protein               |
| ORF66 | 41524 | 41826 | 303  | - |                                                          |              |    |    |    |          | hypothetical protein               |
| ORF67 | 42246 | 42410 | 165  | + |                                                          |              |    |    |    |          | hypothetical protein               |
| ORF68 | 42440 | 42664 | 225  | + |                                                          |              |    |    |    |          | hypothetical protein               |
| ORF69 | 42661 | 42843 | 183  | + |                                                          |              |    |    |    |          | hypothetical protein               |
| ORF70 | 42809 | 42988 | 180  | + |                                                          |              |    |    |    |          | hypothetical protein               |
| ORF71 | 42999 | 43190 | 192  | + | hypothetical protein EFm5_55 Enterococcus phage IME-EFm5 | YP_009200925 | 0  | 71 | 89 | 2.29E-26 | hypothetical protein               |
| ORF72 | 43190 | 43366 | 177  | + | hypothetical protein IME_069 Enterococcus phage IME-EFm1 | YP_009042717 | 10 | 78 | 86 | 3.14E-23 | hypothetical protein               |
| ORF73 | 43565 | 43942 | 378  | + | HNH endonuclease Enterococcus phage IME-EFm5             | YP_009200923 | 0  | 89 | 96 | 4.02E-76 | HNH endonuclease                   |

**Table S2A. Spontaneous, non-synonymous mutations in secreted antigen A (SagA) gene promote phage 9181 resistance**

| Phage 9181 Resistant Mutant | Com12 Contig Number | Contig Position | Variation Type | Variation Frequency (%) | Fold Coverage | Gene locus: SNP/Indel                    | AA change                                         | Putative function                            |
|-----------------------------|---------------------|-----------------|----------------|-------------------------|---------------|------------------------------------------|---------------------------------------------------|----------------------------------------------|
| 81R3                        | NZ_GG670310         | 172959          | SNP            | 100                     | 160           | EFVG_RS16270:313G<br>⇒ T                 | Trp433 ⇒<br>Leu                                   | SagA                                         |
| 81R4                        | NZ_GG670310         | 172960          | SNP            | 100                     | 279           | EFVG_RS16270:<br>314G ⇒ T                | Trp433 ⇒<br>Cys                                   | SagA                                         |
| 81R5                        | NZ_GG670310         | 173040          | SNP            | 100                     | 119           | EFVG_RS16270:394G<br>⇒ A                 | Gly460 ⇒<br>Asp                                   | SagA                                         |
| 81R6                        | NZ_GG670310         | 173014          | Insertion      | 71.79                   | 156           | EFVG_RS16270:368-<br>370 CTT duplication | Leu<br>insertion<br>between<br>Tyr451 &<br>Leu452 | SagA                                         |
| 81R7                        | NZ_GG670306         | 96441           | SNP            | 100                     | 114           | EFVG_RS05165:325G<br>⇒ T                 | Gly109 ⇒<br>Trp                                   | DNA<br>topoisomerase III                     |
| 81R7                        | NZ_GG670306         | 418448          | SNP            | 100                     | 115           | EFVG_RS06695:<br>499C ⇒ T                | Pro167 ⇒<br>Ser                                   | Capsule tyrosine-<br>protein kinase<br>(wze) |
| 81R8                        | NZ_GG670310         | 172965          | SNP            | 99.43                   | 176           | EFVG_RS16270:<br>319G ⇒ T                | Gly435 ⇒<br>Val                                   | SagA                                         |

SNP – Single Nucleotide Polymorphism; Indel – Insertion/Deletion; SagA – secreted antigen A; AA – amino acid

**Table S2B. Spontaneous, non-synonymous mutations in the *epa* locus promotes phage 9183 resistance**

| Phage 9183 Resistant Mutant | 1,141,733 Contig Number | Contig Position | Variation Type | Variation Frequency (%) | Fold Coverage | Gene locus: SNP/Indel          | AA change         | Putative function                                              |
|-----------------------------|-------------------------|-----------------|----------------|-------------------------|---------------|--------------------------------|-------------------|----------------------------------------------------------------|
| 83R1                        | NZ_GG688464             | 157195          | SNP #1         | 100                     | 79            | EFSG_RS16205: 1012C ⇒ T        | Arg338 ⇒ Cys      | Polyprenyl Glycosylphosphotransferase ( <i>epaR</i> )          |
| 83R1                        | NZ_GG688461             | 1077065         | SNP #2         | 100                     | 6             | EFSG_RS11135: 28G ⇒ T          | Ala10 ⇒ Ser       | Endonuclease III ( <i>nth</i> )                                |
| 83R2                        |                         |                 |                |                         |               | No mutation detected           |                   |                                                                |
| 83R3                        | NZ_GG688464             | 156490          | Deletion       | 100                     | 189           | EFSG_RS16205: Deletion of 309T | Phe103 Frameshift | Polyprenyl Glycosylphosphotransferase ( <i>epaR</i> )          |
| 83R4                        | NZ_GG688462             | 47014           | SNP            | 100                     | 167           | EFSG_RS12860: 741C ⇒ T         | Trp104 ⇒ Cys      | Gluconate 5-Dehydrogenase ( <i>gdh</i> )                       |
| 83R4                        | NZ_GG688464             | 161642          | Deletion       | 88.29                   | 111           | EFSG_RS16230: Deletion of 197A | Asn66 Frameshift  | TarS-like Glycosyltransferase ( <i>epaX</i> )                  |
| 83R5                        | NZ_GG688461             | 891434          | SNP #1         | 100                     | 78            | EFSG_RS10305: 5A ⇒ G           | Glu2 ⇒ Gly        | General Stress Response Protein A ( <i>gnsA</i> )              |
| 83R5                        | NZ_GG688464             | 156807          | Deletion       | 95.83                   | 48            | EFSG_RS16205: Deletion of 630A | Glu211 Frameshift | Polyprenyl Glycosylphosphotransferase ( <i>epaR</i> )          |
| 83R5                        | NZ_GG688461             | 332892          | SNP #2         | 43.75                   | 80            | EFSG_RS07565: 985C ⇒ T         | Leu329 ⇒ Phe      | SorC family transcriptional regulator ( <i>sorC</i> )          |
| 83R6                        | NZ_GG688464             | 157113          | SNP            | 100                     | 75            | EFSG_RS16205: 930G ⇒ T         | Met310 ⇒ Ile      | Polyprenyl Glycosylphosphotransferase ( <i>epaR</i> )          |
| 83R7                        | NZ_GG688464             | 67506           | SNP            | 100                     | 74            | EFSG_RS15760: 22G ⇒ T          | Glu8 ⇒ Stop       | D-alanine--poly(phosphoribitol) ligase subunit ( <i>dltA</i> ) |

|      |             |        |          |       |    |                                   |                     |                                                             |
|------|-------------|--------|----------|-------|----|-----------------------------------|---------------------|-------------------------------------------------------------|
| 83R7 | NZ_GG688464 | 161642 | Deletion | 92.05 | 88 | EFSG_RS16230:<br>Deletion of 197A | Asn66<br>Frameshift | Tar-S-like<br>Glycosyltransferase<br>( <i>epaX</i> )        |
| 83R8 | NZ_GG688464 | 157127 | SNP      | 100   | 59 | EFSG_RS16205:<br>944A ⇒ G         | Glu315 ⇒<br>Gly     | Polyprenyl<br>Glycosylphosphotransferase<br>( <i>epaR</i> ) |

SNP – Single Nucleotide Polymorphism; Indel – Insertion/Deletion; AA – Amino Acid

**Table S2C. Spontaneous, non-synonymous mutations in the capsule locus and *rdd* (*efsg\_rs09545*) genes promotes phage 9184 resistance**

| Phage<br>9184<br>Resistant<br>Mutant | 1,141,733<br>Contig Number | Contig<br>Position | Variation<br>Type | Variation<br>Frequency<br>(%) | Fold<br>Coverage | Gene locus:<br>SNP/Indel                  | AA<br>change         | Putative function                                   |
|--------------------------------------|----------------------------|--------------------|-------------------|-------------------------------|------------------|-------------------------------------------|----------------------|-----------------------------------------------------|
| 84R1                                 | NZ_GG688464                | 439094             | Insertion         | 97.66                         | 128              | EFSG_RS08105:<br>Insertion of A at<br>588 | Val197<br>Frameshift | Capsule EpsG<br>family<br>polymerase ( <i>wzy</i> ) |
| 84R2                                 | NZ_GG688461                | 441541             | SNP               | 100                           | 157              | EFSG_RS08120:<br>61C ⇒ T                  | Gln21 ⇒<br>Stop      | Capsule<br>nucleotide sugar<br>dehydrogenase        |
| 84R3                                 | NZ_GG688461                | 441541             | SNP               | 100                           | 138              | EFSG_RS08120:<br>61C ⇒ T                  | Gln21 ⇒<br>Stop      | Capsule<br>nucleotide sugar<br>dehydrogenase        |
| 84R4                                 | NZ_GG688461                | 441541             | SNP               | 100                           | 128              | EFSG_RS08120:<br>61C ⇒ T                  | Gln21 ⇒<br>Stop      | Capsule<br>nucleotide sugar<br>dehydrogenase        |
| 84R5                                 | NZ_GG688461                | 436239             | Deletion          | 100                           | 110              | EFSG_RS08090:<br>Deletion of C at<br>641  | Ala214<br>Frameshift | Capsule<br>Aminotransferase                         |

|                                                                                                                        |                      |        |     |       |    |                           |                 |                                              |
|------------------------------------------------------------------------------------------------------------------------|----------------------|--------|-----|-------|----|---------------------------|-----------------|----------------------------------------------|
| 84R6                                                                                                                   | NZ_GG688461          | 744354 | SNP | 100   | 57 | EFSG_RS09545:<br>557C ⇒ T | Ala186 ⇒<br>Val | RDD family<br>protein                        |
| 84R6                                                                                                                   | NZ_GG688461          | 431883 | SNP | 98.92 | 93 | EFSG_RS08070:<br>250G ⇒ T | Asp84 ⇒<br>Tyr  | Capsule tyrosine-<br>protein kinase<br>(wze) |
| 84R8                                                                                                                   | No mutation detected |        |     |       |    |                           |                 |                                              |
| SNP – Single Nucleotide Polymorphism; Indel – Insertion/Deletion; AA – Amino Acid; RDD – Arginine Aspartate Aspartate; |                      |        |     |       |    |                           |                 |                                              |

Table S3A. **Phage 9181 resistance enhances antimicrobial susceptibility by E-test**

| Strain       | Strain Mutation  | Ampicillin       |                            | Ceftriaxone     |                            | Daptomycin  |                            |
|--------------|------------------|------------------|----------------------------|-----------------|----------------------------|-------------|----------------------------|
|              |                  | Mean MIC (µg/mL) | Standard deviation (µg/mL) | MIC (µg/mL)     | Standard deviation (µg/mL) | MIC (µg/mL) | Standard deviation (µg/mL) |
| <b>Com12</b> | n/a              | 1.33             | 0.29                       | >32             | 0                          | 1.83        | 0.29                       |
| <b>81R3</b>  | <i>sagA</i>      | 0.56             | 0.41                       | <b>2.67****</b> | <b>1.53</b>                | 1.83        | 0.29                       |
| <b>81R4</b>  | <i>sagA</i>      | <b>0.5*</b>      | <b>0.25</b>                | <b>2.67****</b> | <b>0.58</b>                | 1.83        | 0.29                       |
| <b>81R5</b>  | <i>sagA</i>      | 0.83             | 0.29                       | >32             | 0                          | 1.83        | 0.29                       |
| <b>81R6</b>  | <i>sagA</i>      | <b>0.29**</b>    | <b>0.18</b>                | <b>0.83****</b> | <b>0.14</b>                | 2.17        | 0.76                       |
| <b>81R7</b>  | <i>wze, topB</i> | 0.92             | 0.52                       | >32             | 0                          | 1.83        | 0.29                       |
| <b>81R8</b>  | <i>sagA</i>      | <b>0.44*</b>     | <b>0.28</b>                | <b>1.33****</b> | <b>0.29</b>                | 1.83        | 0.29                       |

\* $P < 0.05$ , \*\* $P < 0.01$ , \*\*\*\* $P < 0.0001$  by unpaired t-test; MIC, minimum inhibitory concentration; n/a, not applicable

Table S3B. **Phage 9183 resistance enhances antimicrobial susceptibility by E-test**

| Strain      | Strain Mutation       | Ampicillin   |                            | Ceftriaxone     |                            | Daptomycin    |                            |
|-------------|-----------------------|--------------|----------------------------|-----------------|----------------------------|---------------|----------------------------|
|             |                       | MIC (µg/mL)  | Standard deviation (µg/mL) | MIC (µg/mL)     | Standard deviation (µg/mL) | MIC (µg/mL)   | Standard deviation (µg/mL) |
| <b>733</b>  | n/a                   | 1.08         | 0.38                       | > 32            | 0                          | 1.67          | 0.29                       |
| <b>83R1</b> | <i>epaR nth</i>       | <b>0.20*</b> | <b>0.17</b>                | <b>0.29****</b> | <b>0.08</b>                | <b>0.5**</b>  | <b>0</b>                   |
| <b>83R3</b> | <i>epaR</i>           | <b>0.36*</b> | <b>0.16</b>                | <b>0.33****</b> | <b>0.14</b>                | <b>0.42**</b> | <b>0.14</b>                |
| <b>83R4</b> | <i>epaX gdh</i>       | <b>0.34*</b> | <b>0.19</b>                | <b>0.33****</b> | <b>0.14</b>                | <b>0.33**</b> | <b>0.14</b>                |
| <b>83R5</b> | <i>epaR gnsA sorC</i> | <b>0.27*</b> | <b>0.20</b>                | <b>0.88****</b> | <b>0.98</b>                | <b>0.50**</b> | <b>0.25</b>                |
| <b>83R6</b> | <i>epaR</i>           | <b>0.30*</b> | <b>0.10</b>                | <b>0.25****</b> | <b>0</b>                   | <b>0.67*</b>  | <b>0.29</b>                |
| <b>83R7</b> | <i>epaX</i>           | <b>0.31*</b> | <b>0.16</b>                | <b>0.67****</b> | <b>0.29</b>                | <b>0.38**</b> | <b>0.13</b>                |
| <b>83R8</b> | <i>epaR</i>           | <b>0.27*</b> | <b>0.20</b>                | <b>0.54****</b> | <b>0.40</b>                | <b>0.67*</b>  | <b>0.29</b>                |

\* $P < 0.05$ , \*\* $P < 0.01$ , \*\*\*\* $P < 0.0001$  by unpaired t-test; MIC, minimum inhibitory concentration; n/a, not applicable

**Table S3C. Phage 9184 resistance does not alter antimicrobial susceptibility by E-test**

| Strain | Strain Mutation     | Ampicillin  |                            | Ceftriaxone |                            | Daptomycin  |                            |
|--------|---------------------|-------------|----------------------------|-------------|----------------------------|-------------|----------------------------|
|        |                     | MIC (µg/mL) | Standard deviation (µg/mL) | MIC (µg/mL) | Standard deviation (µg/mL) | MIC (µg/mL) | Standard deviation (µg/mL) |
| 733    | n/a                 | 1.25        | 0.43                       | >32         | 0                          | 1.83        | 0.29                       |
| 84R1   | <i>efsg_rs08105</i> | 1.25        | 0.43                       | >32         | 0                          | 1.83        | 0.29                       |
| 84R2   | <i>efsg_rs08120</i> | 1.33        | 0.76                       | >32         | 0                          | 1.83        | 0.29                       |
| 84R3   | <i>efsg_rs08120</i> | 1.23        | 0.93                       | >32         | 0                          | 2           | 0                          |
| 84R4   | <i>efsg_rs08120</i> | 1.17        | 0.58                       | >32         | 0                          | 1.67        | 0.29                       |
| 84R5   | <i>efsg_rs08090</i> | 1.17        | 0.58                       | >32         | 0                          | 1.67        | 0.29                       |
| 84R6   | <i>rdd, wze</i>     | 1.33        | 0.76                       | >32         | 0                          | 2           | 0                          |

MIC, minimum inhibitory concentration; n/a, not applicable



**Table S4. Bacterial strains, phages, plasmids and primers**

| <b>Strains, phages, plasmids and primers</b> | <b>Characteristics and/or description</b>                                                                                                                            | <b>Reference/Source</b> |
|----------------------------------------------|----------------------------------------------------------------------------------------------------------------------------------------------------------------------|-------------------------|
| <b><i>Enterococcus faecium</i></b>           |                                                                                                                                                                      |                         |
| <b>1,141,733</b>                             | clinical isolate (blood); USA, 2006                                                                                                                                  | (1)                     |
| <b>Com12</b>                                 | human fecal isolate; USA, 2006                                                                                                                                       | (1)                     |
| <b>Com15</b>                                 | Human fecal isolate; USA, 2006                                                                                                                                       | (1)                     |
| <b>1,231,408</b>                             | clinical isolate (blood); USA, 2005; Amp <sup>R</sup> , Cip <sup>R</sup>                                                                                             | (1)                     |
| <b>1,231,501</b>                             | clinical isolate (blood); USA, 2005                                                                                                                                  | (1)                     |
| <b>1,231,410</b>                             | clinical isolate (blood); USA, 2005; Van <sup>R</sup> , Amp <sup>R</sup> Cip <sup>R</sup>                                                                            | (1)                     |
| <b>1,231,502</b>                             | clinical isolate (blood); USA, 2005; Van <sup>R</sup> , Amp <sup>R</sup> Cip <sup>R</sup>                                                                            | (1)                     |
| <b>1,230,933</b>                             | clinical isolate (blood); USA, 2005; Van <sup>R</sup> , Amp <sup>R</sup> Cip <sup>R</sup>                                                                            | (1)                     |
| <b>U37</b>                                   | clinical isolate (tissue source unknown); USA; 1998; Van <sup>R</sup> , Amp <sup>R</sup> , Erm <sup>R</sup> , Gen <sup>R</sup> , Str <sup>R</sup> , Tet <sup>R</sup> | (2)                     |
| <b>H11</b>                                   | clinical isolate (tissue source unknown); USA; 1998; Van <sup>R</sup> , Amp <sup>R</sup> , Erm <sup>R</sup> , Gen <sup>R</sup> , Str <sup>R</sup> , Tc <sup>R</sup>  | (2)                     |
| <b>81R3-<i>sagA</i></b>                      | 81R3 ( <i>sagA</i> SNP) strain carrying pAM401- <i>sagA</i> complementation vector                                                                                   | This study              |
| <b>81R3-E</b>                                | 81R3 ( <i>sagA</i> SNP) strain carrying pAM401 empty vector                                                                                                          | This study              |
| <b>81R4-<i>sagA</i></b>                      | 81R4 ( <i>sagA</i> SNP) strain carrying pAM401- <i>sagA</i> complementation vector                                                                                   | This study              |
| <b>81R4-E</b>                                | 81R4 ( <i>sagA</i> SNP) strain carrying pAM401 empty vector                                                                                                          | This study              |
| <b>81R5-<i>sagA</i></b>                      | 81R5 ( <i>sagA</i> SNP) strain carrying pAM401- <i>sagA</i> complementation vector                                                                                   | This study              |
| <b>81R5-E</b>                                | 81R5 ( <i>sagA</i> SNP) strain carrying pAM401 empty vector                                                                                                          | This study              |
| <b>81R6-<i>sagA</i></b>                      | 81R6 ( <i>sagA</i> SNP) strain carrying pAM401- <i>sagA</i> complementation vector                                                                                   | This study              |
| <b>81R6-E</b>                                | 81R6 ( <i>sagA</i> SNP) strain carrying pAM401 empty vector                                                                                                          | This study              |
| <b>81R7-<i>wze</i>-Com12</b>                 | 81R7 ( <i>wze</i> , <i>topB</i> SNPs) strain carrying pLZ12a- <i>wze</i> -Com12 complementation vector                                                               | This study              |
| <b>81R7-E</b>                                | 81R7 ( <i>wze</i> , <i>topB</i> SNPs) strain carrying pLZ12a empty vector                                                                                            | This study              |
| <b>81R8-<i>sagA</i></b>                      | 81R8 ( <i>sagA</i> SNP) strain carrying pAM401- <i>sagA</i> complementation vector                                                                                   | This study              |

|                            |                                                                                                                 |            |
|----------------------------|-----------------------------------------------------------------------------------------------------------------|------------|
| <b>81R8-E</b>              | 81R8 ( <i>sagA</i> SNP) strain carrying pAM401 empty vector                                                     | This study |
| <b>83R1-<i>epaR</i></b>    | 83R1 ( <i>epaR</i> , <i>nth</i> SNPs) strain carrying pLZ12a- <i>epaR</i> complementation vector                | This study |
| <b>83R1-E</b>              | 83R1 ( <i>epaR</i> , <i>nth</i> SNPs) strain carrying pLZ12a empty vector                                       | This study |
| <b>83R3-<i>epaR</i></b>    | 83R1 ( <i>epaR</i> SNP) strain carrying pLZ12a- <i>epaR</i> complementation vector                              | This study |
| <b>83R3-E</b>              | 83R3 ( <i>epaR</i> SNP) strain carrying pLZ12a empty vector                                                     | This study |
| <b>83R4-<i>epaX</i></b>    | 83R4 ( <i>epaX</i> , <i>gdh</i> SNP) strain carrying- <i>epaX</i> complementation vector                        | This study |
| <b>83R4-E</b>              | 83R4 ( <i>epaX</i> , <i>gdh</i> SNP) strain carrying pLZ12a empty vector                                        | This study |
| <b>83R5-<i>epaR</i></b>    | 83R5 ( <i>epaR</i> , <i>gnsA</i> , <i>sorC</i> SNPs) strain carrying pLZ12a- <i>epaR</i> complementation vector | This study |
| <b>83R5-E</b>              | 83R5 ( <i>epaR</i> , <i>gnsA</i> , <i>sorC</i> SNPs) strain carrying pLZ12a empty vector                        | This study |
| <b>83R6-<i>epaR</i></b>    | 83R6 ( <i>epaR</i> SNP) strain carrying pLZ12a- <i>epaR</i> complementation vector                              | This study |
| <b>83R6-E</b>              | 83R6 ( <i>epaR</i> SNP) strain carrying pLZ12a empty vector                                                     | This study |
| <b>83R7-<i>epaX</i></b>    | 83R7 ( <i>epaX</i> , <i>dltA</i> SNPs) strain carrying pLZ12a- <i>epaX</i> complementation vector               | This study |
| <b>83R7-<i>dltA</i></b>    | 83R7 ( <i>epaX</i> , <i>dltA</i> SNPs) strain carrying pLZ12a- <i>dltA</i> complementation vector               | This study |
| <b>83R7-E</b>              | 83R7 ( <i>epaX</i> , <i>dltA</i> SNPs) strain carrying pLZ12a empty vector                                      | This study |
| <b>83R8-<i>epaR</i></b>    | 83R8 ( <i>epaR</i> SNP) strain carrying pLZ12a- <i>epaR</i> complementation vector                              | This study |
| <b>83R8-E</b>              | 83R8 ( <i>epaR</i> SNP) strain carrying pLZ12a empty vector                                                     | This study |
| <b>84R2-8120</b>           | 84R2 ( <i>efsg_rs08120</i> SNP) strain carrying pLZ12a-8120 vector                                              | This study |
| <b>84R2-E</b>              | 84R2 ( <i>efsg_rs08120</i> SNP) strain carrying pLZ12a empty vector                                             | This study |
| <b>84R3-8120</b>           | 84R3 ( <i>efsg_rs08120</i> SP) strain carrying pLZ12a-8120 vector                                               | This study |
| <b>84R3-E</b>              | 84R3 ( <i>efsg_rs08120</i> SNP) strain carrying pLZ12a empty vector                                             | This study |
| <b>84R4-8120</b>           | 84R4 ( <i>efsg_rs08120</i> SP) strain carrying pLZ12a-8120 vector                                               | This study |
| <b>84R4-E</b>              | 84R4 ( <i>efsg_rs08120</i> SNP) strain carrying pLZ12a empty vector                                             | This study |
| <b>84R5-8090</b>           | 84R5 ( <i>efsg_rs08105</i> SNP) strain carrying pLZ12a-8090 complementation vector                              | This study |
| <b>84R5-E</b>              | 84R5 ( <i>efsg_rs08105</i> SNP) strain carrying pLZ12a empty vector                                             | This study |
| <b>84R6-<i>wze</i>-733</b> | 84R6 ( <i>wze</i> , <i>rdd</i> SNP) strain carrying pLZ12a- <i>wze</i> complementation vector                   | This study |
| <b>84R6-E</b>              | 84R6 ( <i>wze</i> , <i>rdd</i> SNP) strain carrying pLZ12a empty vector                                         | This study |

|              |                                                                                                                                       |            |
|--------------|---------------------------------------------------------------------------------------------------------------------------------------|------------|
| <b>UCH1</b>  | clinical isolate (blood); Dap <sup>R</sup> , Amp <sup>R</sup> , Van <sup>R</sup> ; University of Colorado Hospital                    | This study |
| <b>UCH2</b>  | clinical isolate (blood); University of Colorado Hospital                                                                             | This study |
| <b>UCH3</b>  | clinical isolate (blood); Dap <sup>SDD</sup> , Amp <sup>R</sup> , Van <sup>R</sup> ; University of Colorado Hospital                  | This study |
| <b>UCH4</b>  | clinical isolate (blood); Dap <sup>R</sup> , Amp <sup>R</sup> , Van <sup>R</sup> ; University of Colorado Hospital                    | This study |
| <b>UCH5</b>  | clinical isolate (blood); Dap <sup>R</sup> , Amp <sup>R</sup> , Van <sup>R</sup> ; University of Colorado Hospital                    | This study |
| <b>UCH6</b>  | clinical isolate (blood); Dap <sup>R</sup> , Lin <sup>I</sup> , Amp <sup>R</sup> , Van <sup>R</sup> ; University of Colorado Hospital | This study |
| <b>UCH7</b>  | clinical isolate (blood); Dap <sup>SDD</sup> , Amp <sup>R</sup> , Van <sup>R</sup> ; University of Colorado Hospital                  | This study |
| <b>UCH8</b>  | clinical isolate (blood); Amp <sup>R</sup> , Van <sup>R</sup> , Str <sup>R</sup> ; University of Colorado Hospital                    | This study |
| <b>UCH9</b>  | clinical isolate (blood); Amp <sup>R</sup> , Van <sup>R</sup> ; University of Colorado Hospital                                       | This study |
| <b>UCH10</b> | clinical isolate (spleen); Dap <sup>R</sup> , Amp <sup>R</sup> ; University of Colorado Hospital                                      | This study |
| <b>UCH11</b> | clinical isolate (ascites); University of Colorado Hospital                                                                           | This study |

#### **Phage resistant strains obtained *in vitro***

|             |                                                                                                                |            |
|-------------|----------------------------------------------------------------------------------------------------------------|------------|
| <b>81R3</b> | phage 9181 resistant mutant of Com12; <i>sagA</i> SNP; Trp 433 Leu                                             | This study |
| <b>81R4</b> | phage 9181 resistant mutant of Com12; <i>sagA</i> SNP; Trp 433 Cys                                             | This study |
| <b>81R5</b> | phage 9181 resistant mutant of Com12; <i>sagA</i> SNP; Gly 460 Asp                                             | This study |
| <b>81R6</b> | phage 9181 resistant mutant of Com12; <i>sagA</i> insertion; Leu insertion between Tyr 451 and Leu 452         | This study |
| <b>81R7</b> | phage 9181 resistant mutant of Com12; <i>wze</i> SNP; Pro 167 Ser; <i>topB</i> SNP; Gly 109 Trp                | This study |
| <b>81R8</b> | phage 9181 resistant mutant of Com12; <i>sagA</i> SNP; Gly 435 Val                                             | This study |
| <b>83R1</b> | phage 9183 resistant mutant of 1,141,733; <i>epaR</i> SNP; Arg 338 Cys; <i>nth</i> SNP; Ala 10 Ser             | This study |
| <b>83R2</b> | Phage 9183 resistant mutat of 1,141,733; unknown mutation causing phage 9183 resistance                        | This study |
| <b>83R3</b> | phage 9183 resistant mutant of 1,141,733; <i>epaR</i> deletion; Phe 103 frameshift                             | This study |
| <b>83R4</b> | phage 9183 resistant mutant of 1,141,733; <i>epaX</i> deletion; Asn 66 frameshift; <i>gdh</i> SNP; Trp 104 Cys | This study |

|             |                                                                                                                                              |            |
|-------------|----------------------------------------------------------------------------------------------------------------------------------------------|------------|
| <b>83R5</b> | phage 9183 resistant mutant of 1,141,733; <i>epaR</i> deletion; Glu 211 frameshift; <i>gnsA</i> SNP; Glu 2 Gly; <i>sorC</i> SNP; Leu 329 Phe | This study |
| <b>83R6</b> | phage 9183 resistant mutant of 1,141,733; <i>epaR</i> SNP; Met 310 Ile                                                                       | This study |
| <b>83R7</b> | phage 9183 resistant mutant of 1,141,733; <i>epaX</i> deletion; Asn 66 frameshift; <i>dltA</i> SNP; Glu 8 Stop                               | This study |
| <b>83R8</b> | phage 9183 resistant mutant of 1,141,733; <i>epaR</i> SNP; Glu 315 Gly                                                                       | This study |
| <b>84R2</b> | phage 9184 resistant mutant of 1,141,733; <i>efsg_rs08120</i> SNP; Gln 21 Stop                                                               | This study |
| <b>84R3</b> | phage 9184 resistant mutant of 1,141,733; <i>efsg_rs08120</i> SNP; Gln 21 Stop                                                               | This study |
| <b>84R4</b> | phage 9184 resistant mutant of 1,141,733; <i>efsg_rs08120</i> SNP; Gln 21 Stop                                                               | This study |
| <b>84R5</b> | phage 9184 resistant mutant of 1,141,733; <i>efsg_rs08090</i> deletion; Ala 214 frameshift                                                   | This study |
| <b>84R6</b> | phage 9184 resistant mutant of 1,141,733; <i>wze</i> SNP; Asp 84 Tyr; <i>rdd</i> SNP; Ala 186 Val                                            | This study |
| <b>84R8</b> | Phage 9184 resistant mutant of 1,141,733; unknown mutation causing phage 9183 resistance                                                     | This study |

---

***Enterococcus faecalis***

|              |                                                                                                 |            |
|--------------|-------------------------------------------------------------------------------------------------|------------|
| <b>OG1RF</b> | Human oral isolate; Rf <sup>R</sup> , Fa <sup>R</sup>                                           | (3)        |
| <b>UCH12</b> | clinical isolate (blood); Str <sup>R</sup> , Gen <sup>R</sup> ; University of Colorado Hospital | This study |
| <b>UCH13</b> | clinical isolate (blood); Str <sup>R</sup> , Gen <sup>R</sup> ; University of Colorado Hospital | This study |
| <b>UCH14</b> | clinical isolate (blood); Str <sup>R</sup> ; University of Colorado Hospital                    | This study |
| <b>UCH15</b> | clinical isolate (blood); University of Colorado Hospital                                       | This study |
| <b>UCH16</b> | clinical isolate (spine tissue); Dox <sup>R</sup> ; University of Colorado Hospital             | This study |
| <b>UCH17</b> | clinical isolate (joint tissue); Dox <sup>R</sup> ; University of Colorado Hospital             | This study |
| <b>UCH18</b> | clinical isolate (heart valve tissue); University of Colorado Hospital                          | This study |
| <b>UCH19</b> | clinical isolate (heart valve tissue); University of Colorado Hospital                          | This study |
| <b>UCH20</b> | clinical isolate (heart valve tissue); University of Colorado Hospital                          | This study |

---

***Escherichia coli***

---

|                         |                                                                                                                |            |
|-------------------------|----------------------------------------------------------------------------------------------------------------|------------|
| <b>TG1</b>              | <i>[F' traD36 proAB laclqZ ΔM15] supE thi-1 Δ(lac-proAB) Δ(mcrBhsdSM)5(rK - mK -)</i>                          | Lucigen    |
| <b>Phages</b>           |                                                                                                                |            |
| <b>phage 9181</b>       | raw sewage isolate, prolate-head, Siphoviridae                                                                 | This study |
| <b>phage 9183</b>       | raw sewage isolate, icosahedral-head, Siphoviridae                                                             | This study |
| <b>phage 9184</b>       | raw sewage isolate, icosahedral-head, Siphoviridae                                                             | This study |
| <b>Plasmids</b>         |                                                                                                                |            |
| <b>pAM401</b>           | <i>E. coli-E. faecalis</i> shuttle vector; pIP501 origin; Cm <sup>R</sup> , Tc <sup>R</sup>                    | (4)        |
| <b>pAM401-SagA</b>      | pAM401 plasmid expressing <i>E. faecium</i> Com15 <i>sagA</i> promoter fused to <i>sagA</i> ORF with His-6 tag | (5)        |
| <b>pLZ12A</b>           | <i>bacA</i> promoter cloned into shuttle vector pLZ12; pSH71 origin; Cm <sup>R</sup>                           | (6, 7)     |
| <b>pLZ12A-wze-Com12</b> | pLZ12A plasmid expressing <i>E. faecium</i> Com12 <i>wze</i> from the P- <i>bacA</i> promoter                  | This study |
| <b>pLZ12A-epaR</b>      | pLZ12A plasmid expressing <i>E. faecium</i> 1,141,733 <i>epaR</i> from the <i>bacA</i> promoter                | This study |
| <b>pLZ12A-epaX</b>      | pLZ12A plasmid expressing <i>E. faecium</i> 1,141,733 <i>epaX</i> from the <i>bacA</i> promoter                | This study |
| <b>pLZ12A-dltA</b>      | pLZ12A plasmid expressing <i>E. faecium</i> 1,141,733 <i>dltA</i> from the <i>bacA</i> promoter                | This study |
| <b>pLZ12A-8120</b>      | pLZ12A plasmid expressing <i>E. faecium</i> 1,141,733 <i>efsg_rs08120</i> from the <i>bacA</i> promoter        | This study |
| <b>pLZ12A-8090</b>      | pLZ12A plasmid expressing <i>E. faecium</i> 1,141,733 <i>efsg_rs08090</i> from the <i>bacA</i> promoter        | This study |
| <b>pLZ12A-wze-733</b>   | pLZ12A plasmid expressing <i>E. faecium</i> 1,141,733 <i>wze</i> from the <i>bacA</i> promoter                 | This study |
| <b>Primers</b>          |                                                                                                                |            |
| <b>wze-Com12-comp-F</b> | NNNNN <u>NGAATTC</u> ATGGCACGAACACAGAAACA                                                                      | This Study |

|                               |                                                     |            |
|-------------------------------|-----------------------------------------------------|------------|
| <b>wze-Com12-comp-R</b>       | NNNNNN <u>GGATCCT</u> CGGTGGATGTCTTCGATCA           | This Study |
| <b>epaR-comp-F</b>            | NNNNNNCTGCAGATGAATAAAAATGGGGAGTGGAAATG              | This Study |
| <b>epaR-comp-R</b>            | NNNNNN <u>GGATCC</u> CCTTGGATAGCTGACTGAATC          | This Study |
| <b>epaX-comp-F</b>            | NNNNNN <u>GAATTC</u> ATGTGTGAGATTAGTATTATTGTTCTG    | This Study |
| <b>epaX-comp-R</b>            | NNNNNN <u>GGATCCT</u> GAAATGGTCCTCCCTACCT           | This Study |
| <b>dltA-comp-F</b>            | NNNNNN <u>GAATTC</u> ATGGAAATCAAACGATTATTGAAGC      | This Study |
| <b>dltA-comp-R</b>            | NNNNN <u>GGATCC</u> AACGATTGGTATAAGCGCAATG          | This Study |
| <b>8120-comp-F</b>            | NNNNNNCTGCAGATGAAAGTATCAGTTTTTGGTCTC                | This Study |
| <b>8120-comp-R</b>            | NNNNNN <u>GGATCCT</u> TTCATGGTTTAATCCCGTCTAA        | This Study |
| <b>8090-comp-F</b>            | NNNNNN <u>GAATTC</u> TTGGAAAATAAACGAATATTATTAGCATCT | This Study |
| <b>8090-comp-R</b>            | NNNNNN <u>GGATCCT</u> GAGAGCGATACTTGACAATAGG        | This Study |
| <b>wze-733-comp-F</b>         | NNNNNN <u>GAATTC</u> ATGGCACGAACACAGAAACA           | This Study |
| <b>wze-733-comp-R</b>         | NNNNNN <u>GGATCCC</u> GATCATTCTCTTGTCTCCTCTC        | This Study |
| <b>16270-Com12-gap-F</b>      | NNNNNNCAGAACAAGCACGTCAACAAG                         | This Study |
| <b>16270-com12-gap-R</b>      | NNNNNNAATCCTGAGCAGTCAAATCCA                         | This Study |
| <b>Phage-9181-Lysin-F</b>     | GCAACGCATAACCAACCTAAC                               | This Study |
| <b>Phage-9181-Lysin-R</b>     | GTCTCCACCTTGATAGCCATAC                              | This Study |
| <b>Phage-9183-Integrase-F</b> | GCAGACATTCGTGCTTTCTTT                               | This Study |
| <b>Phage-9183-Integrase-R</b> | CTCCTCGTTGATCAAACCATTTC                             | This Study |
| <b>Phage-9184-Lysin-F</b>     | GGGTAACCTAACAGCCATACA                               | This Study |
| <b>Phage-9184-Lysin-R</b>     | AGTTCTTGTCCGCCTTGATAG                               | This Study |

---

**Dap<sup>R</sup> - daptomycin resistance; Dap<sup>SDD</sup> - daptomycin susceptibility dose dependent; Lin<sup>I</sup> - linezolid intermediate; Amp<sup>R</sup> - ampicillin resistant; Van<sup>R</sup> - vancomycin resistant; Str<sup>R</sup> - Streptomycin resistant; Erm<sup>R</sup> – erythromycin resistant; Gen<sup>R</sup> – gentamicin resistant; Cip<sup>R</sup> – ciprofloxacin resistant; Dox<sup>R</sup> – doxycycline resistant; Rf<sup>R</sup> – rifampin resistant; Fa<sup>R</sup> – fusidic acid resistant; Restriction sites are underlined**

---

## References:

1. Palmer KL, Godfrey P, Griggs A, Kos VN, Zucker J, Desjardins C, Cerqueira G, Gevers D, Walker S, Wortman J, Feldgarden M, Haas B, Birren B, Gilmore MS. 2012. Comparative genomics of enterococci: variation in *Enterococcus faecalis*, clade structure in *E. faecium*, and defining characteristics of *E. gallinarum* and *E. casseliflavus*. mBio 3:e00318-11. doi:10.1128/mBio.00318-11.
2. Rice LB, Carias LL, Donskey CL, Rudin SD. 1998. Transferable, plasmid-mediated VanB-type glycopeptide resistance in *Enterococcus faecium*. Antimicrob Agents Chemother 42:963-4.
3. Bourgogne A, Garsin DA, Qin X, Singh KV, Sillanpaa J, Yerrapragada S, Ding Y, Dugan-Rocha S, Buhay C, Shen H, Chen G, Williams G, Muzny D, Maadani A, Fox KA, Gioia J, Chen L, Shang Y, Arias CA, Nallapareddy SR, Zhao M, Prakash VP, Chowdhury S, Jiang H, Gibbs RA, Murray BE, Highlander SK, Weinstock GM. 2008. Large scale variation in *Enterococcus faecalis* illustrated by the genome analysis of strain OG1RF. Genome Biol 9:R110. doi:10.1186/gb-2008-9-7-r110.
4. Wirth R, An FY, Clewell DB. 1986. Highly efficient protoplast transformation system for *Streptococcus faecalis* and a new *Escherichia coli*-*S. faecalis* shuttle vector. J Bacteriol 165:831-6. doi:10.1128/jb.165.3.831-836.1986.
5. Rangan KJ, Pedicord VA, Wang YC, Kim B, Lu Y, Shaham S, Mucida D, Hang HC. 2016. A secreted bacterial peptidoglycan hydrolase enhances tolerance to enteric pathogens. Science 353:1434-1437. doi:10.1126/science.aaf3552.
6. Chatterjee A, Johnson CN, Luong P, Hullahalli K, McBride SW, Schubert AM, Palmer KL, Carlson PE, Jr., Duerkop BA. 2019. Bacteriophage resistance alters antibiotic-mediated intestinal expansion of enterococci. Infect Immun 87:e00085-19. doi:10.1128/iai.00085-19.
7. Perez-Casal J, Caparon MG, Scott JR. 1991. Mry, a trans-acting positive regulator of the M protein gene of *Streptococcus pyogenes* with similarity to the receptor proteins of two-component regulatory systems. J Bacteriol 173:2617-24. doi:10.1128/jb.173.8.2617-2624.1991.
